# Supplementary material for: Development and validation of a risk prediction model for overall survival in cervical cancer patients under 50: a prospective cohort study in southwest China
Source: PeerJ. 2026 Jan 5;14:e20509. doi: 10.7717/peerj.20509 (PMC12782029; doi:10.7717/peerj.20509)
Supplement: Supplemental Information 1 [file peerj-14-20509-s001.xlsx]

## Sheet: peerj-109497-original_data
Time	Survival (0=survive, 1=die)	Age	Medicainsurance (1=URBMI, 2=UEBMI)	Marital (1=Married, 2=others)	Ethnic (1=Han, 2=Minority)	Pathological (1=Squamous carcinoma, 2=Adenocarcinoma, 3=Others)	Stage (1=Ⅰ 2=Ⅱ, 3=Ⅲ, 4=Ⅳ)	HPV (0=negative, 1=positive)	Surgery (0=no, 1=yes)	Radiotherapy (0=no, 1=yes)	Chemotherapy (0=no, 1=yes）	Targeted (0=no, 1=yes）	Immunity (0=no, 1=yes）	b2.microglobulin	A.G	NLR	PLR	N1	LYM	Alb
37.6	0	47	2	1	1	2	1	0	1	0	0	0	0	1.7	1.4	1.73	119.35	2.68	1.55	43.1
49.2	0	34	2	1	1	1	1	1	1	0	0	0	0	1.8	1.71	2.06	170.81	3.31	1.61	49.56
59.6	0	46	2	1	1	1	2	0	1	1	1	0	0	1.4	1.45	1.97	123.68	2.99	1.52	44.49
49.3	0	37	1	1	1	1	1	1	1	0	0	0	0	1.5	1.78	1.29	254.96	1.69	1.31	50.78
27.3	0	45	1	2	1	1	3	1	1	1	1	0	0	1.9	1.41	3.47	201.72	6.04	1.74	35.07
61.8	0	32	1	1	1	1	1	1	1	0	0	0	0	1.46	1.93	1.9	131.91	4.47	2.35	48.85
31.5	0	46	2	2	1	1	1	0	1	0	0	0	0	2.2	1.37	3.69	148.55	5.09	1.38	49.78
50.5	0	32	1	1	1	1	2	1	1	0	0	0	0	2.6	1.47	3.74	149.67	5.72	1.53	45.74
61.7	0	39	1	1	1	1	2	0	1	0	0	0	0	1.3	1.45	1.72	136.72	3.04	1.77	39.36
61.4	0	37	1	1	1	1	1	0	1	0	0	0	0	0.2	1.5	1.16	136.9	3.15	2.71	44.84
14.1	1	43	1	1	1	1	2	1	1	0	0	0	0	2.2	1.41	1.59	208	2.38	1.5	39.4
5.1	0	38	2	1	1	1	1	1	1	0	0	0	0	1.6	1.74	2.26	89.89	4.24	1.88	47.01
41.5	0	38	1	1	1	1	1	0	1	1	1	0	0	1.4	1.81	2.67	134.62	6.25	2.34	41.6
13.1	1	41	1	1	1	1	2	0	1	0	0	0	0	1.2	1.65	1.63	152.75	3.56	2.18	38.6
40.9	0	35	1	1	1	1	1	1	1	1	1	1	0	1.3	1.59	1.51	139.86	2.09	1.38	41.3
49.6	0	43	1	1	1	1	1	0	1	0	0	0	0	1.7	2.35	2.62	139.88	4.4	1.68	50.7
85.6	0	35	1	1	1	1	1	1	1	0	0	0	0	0.9	1.64	2.26	106.28	4.68	2.07	39.29
83.5	0	33	2	1	1	2	1	1	1	0	0	0	0	1.1	1.8	3.25	142.62	3.96	1.22	49.71
60.8	0	38	1	1	1	1	1	1	1	0	0	0	0	0.8	1.92	3.72	146.23	3.94	1.06	54.44
43	0	44	1	1	1	1	1	1	1	1	1	0	0	2.3	1.42	2.97	152.21	3.36	1.13	44.9
74	0	39	2	1	1	1	1	0	1	0	0	0	0	1.6	1.73	1.53	122.89	2.54	1.66	47.99
21.9	1	36	2	1	1	3	1	1	1	1	1	1	0	1.8	1.72	1.65	79.22	3.82	2.31	44.54
97	0	49	1	1	1	2	1	0	1	0	0	0	0	0.97	1.5	5.05	227.59	2.93	0.58	43.77
48.8	0	41	1	1	1	1	1	1	1	1	1	0	0	1.2	2.18	1.97	85.16	3.59	1.82	49.53
48.2	0	45	2	1	1	1	1	0	1	0	0	0	0	1.2	1.82	1.81	128.29	4.68	2.58	46.78
12.9	0	50	2	1	1	1	3	1	1	0	0	0	0	1.8	1.44	2.41	267.88	3.3	1.37	38.8
49.4	0	28	1	1	1	1	3	0	1	0	0	0	0	2.57	1.27	3.71	220	4.45	1.2	44.09
3.8	0	25	1	1	1	1	1	0	1	0	0	0	0	1	1.39	4.43	147.5	5.31	1.2	45.47
25.3	1	24	1	1	1	1	1	1	1	0	0	0	0	1.2	1.6	3.85	200.93	4.12	1.07	41.09
86.1	0	28	1	2	1	1	1	1	1	0	0	0	0	1.5	2.75	2.18	106.38	4.09	1.88	49.87
22.8	0	28	1	1	1	1	1	0	1	0	0	0	0	1.8	1.42	1.39	169.4	2.55	1.83	39.7
50.7	0	31	2	1	1	1	1	1	1	0	0	0	0	2.1	1.64	2.89	138.71	4.48	1.55	45.45
37.8	0	35	2	1	1	1	1	1	1	0	0	0	0	2	1.67	1.49	82.38	2.87	1.93	41.42
25.7	0	33	2	1	1	1	3	0	1	1	1	1	0	2.1	1.5	2.55	125.78	3.27	1.28	51.33
62	0	36	1	1	1	1	1	0	1	0	0	0	0	2	1.49	1.07	83.62	1.9	1.77	41.3
37.1	0	34	2	1	1	1	3	1	1	0	0	0	0	1.9	1.56	2.33	133.33	3.85	1.65	44.2
13	0	35	1	2	1	2	3	1	1	1	1	0	0	1.2	1.59	5.02	366.67	7.38	1.47	46.6
39.1	0	32	1	1	1	2	1	0	1	0	0	0	0	1.7	1.15	4.25	157.23	7.36	1.73	47.18
59.1	0	26	1	1	1	1	1	1	1	0	0	0	0	1.9	1.48	1.8	172.38	3.25	1.81	43.02
49.5	0	34	1	2	1	1	1	0	1	0	0	0	0	1.3	1.37	2.96	139.9	5.72	1.93	49.71
61.2	0	28	1	1	1	1	1	1	1	0	0	0	0	1.1	1.42	4.49	138	6.74	1.5	52.84
37.3	0	33	2	1	1	1	1	0	1	0	0	0	0	1.7	1.52	2.32	182.1	3.76	1.62	50.4
47.8	0	31	2	1	1	1	1	1	1	0	0	0	0	1.6	1.25	2.12	127.78	3.44	1.62	46.13
31.8	0	33	1	1	1	1	1	1	1	1	1	0	0	2.9	1.04	1.28	173.96	2.46	1.92	40.76
37	0	32	2	1	1	1	1	0	1	0	0	0	0	1.6	1.4	2.48	132.95	4.36	1.76	54
43.7	0	31	1	1	1	1	2	0	1	0	0	0	0	1.7	1.88	2.57	120	3.6	1.4	49.17
37.2	0	29	1	1	1	1	1	0	1	0	0	0	0	2	1.65	3.66	145.96	7.25	1.98	50.4
6	0	30	1	1	1	1	1	0	1	0	0	0	0	1.31	1.61	2.22	124.58	5.24	2.36	48.51
14.4	1	30	1	1	1	1	3	0	1	1	1	1	0	3.6	0.71	21.07	1114.75	12.85	0.61	28.5
24.6	0	33	1	1	1	1	2	1	1	1	1	0	0	1.2	1.32	2.53	116.56	3.82	1.51	43.7
20.6	0	33	1	2	1	1	1	0	1	1	1	0	0	2.1	1.1	6.47	239.22	6.6	1.02	43.3
40.4	0	27	1	2	1	2	2	1	1	1	1	0	0	1.3	1.4	1.56	124.88	3.25	2.09	45.5
39.2	0	31	2	1	1	1	1	0	1	0	0	0	0	1.4	1.55	3.59	93.37	5.96	1.66	45.2
7	1	32	1	2	1	1	1	1	1	1	1	0	0	5.5	0.98	21.72	430.68	19.11	0.88	37.39
17.2	0	23	2	2	1	1	3	1	1	1	1	1	0	1.4	1.29	4.58	338.74	5.08	1.11	44.54
60.4	0	29	1	1	1	1	2	1	1	0	0	0	0	0.2	1.91	1.56	87.26	2.45	1.57	49.6
35.7	0	30	1	1	1	1	3	1	1	1	1	0	0	2.7	1.49	2.39	284.44	3.23	1.35	44.96
16.9	1	24	1	1	1	3	1	0	1	0	0	0	0	0.9	1.73	3.47	71.54	4.27	1.23	50.01
37.6	0	46	1	1	1	1	1	0	1	0	0	0	0	1.7	1.31	1.67	167.71	1.6	0.96	44.28
42.2	0	35	1	1	1	1	1	0	1	0	0	0	0	2.3	1.29	2.62	109.34	4.77	1.82	41.39
24.9	0	34	1	1	1	1	1	0	1	1	1	0	0	2	1.91	1.55	69.76	3.17	2.05	41
24.2	0	48	1	1	1	1	1	0	1	1	1	0	0	2.1	1.33	2.81	222.22	3.03	1.08	41.44
61	0	32	1	1	1	1	1	0	1	0	0	0	0	1.7	1.4	2.78	98.4	3.47	1.25	48.46
35.8	0	25	1	1	1	1	1	0	1	1	1	0	0	1.7	1.38	2.46	141.61	3.37	1.37	42
39.5	0	34	1	1	2	1	2	1	1	0	0	0	0	1.3	2.02	2.65	125.95	4.9	1.85	47.74
48.3	0	31	1	1	2	1	1	1	1	0	0	0	0	1.9	1.35	1.69	166.27	1.4	0.83	44.64
59.7	0	30	1	1	1	1	1	1	1	0	0	0	0	0.9	1.83	1.8	76.95	4.37	2.43	46.54
11.8	1	30	2	1	1	1	3	1	1	0	0	1	0	1.5	1.36	1.95	194.87	3.04	1.56	40
85	0	29	1	1	1	1	1	1	1	0	0	0	0	1.7	2.06	2.05	81.63	5.81	2.83	51.79
17.4	0	24	1	2	1	1	3	1	1	1	1	0	0	2.1	1.28	3.22	167.5	6.44	2	39.57
24.3	1	28	1	1	1	1	3	1	1	1	1	0	0	2.1	0.97	4.41	206.13	9.35	2.12	37.23
61.1	0	30	1	1	1	1	1	1	1	0	0	0	0	1.1	1.09	5.61	155.71	12.29	2.19	41.49
102.5	0	50	2	1	1	1	2	0	1	1	1	0	0	1.6	1.1	3.63	154.25	5.55	1.53	39.87
99.1	0	50	2	1	1	1	1	1	1	0	0	0	0	0.7	1.53	2.42	198.61	3.48	1.44	47.03
63.1	0	49	2	1	1	1	1	1	1	0	0	0	0	2.42	0.95	2.37	160.68	4.88	2.06	41.03
74.1	0	47	2	1	1	1	2	0	1	0	0	0	0	1	1.62	1.4	100.55	2.57	1.83	44.82
9.5	1	49	1	1	1	1	1	0	1	0	0	0	0	1.9	1.72	5.08	381.93	4.22	0.83	50.21
13.3	0	48	2	1	1	1	3	0	1	1	1	1	0	2.6	1.19	2.56	162.98	5.32	2.08	43.52
43	1	43	2	2	1	1	2	0	1	0	0	0	0	3.2	1.58	5.77	76.34	7.56	1.31	47.81
36.1	0	45	2	1	1	2	1	0	1	1	1	0	0	1.5	1.1	3.7	214.81	4.99	1.35	41.5
53.1	0	39	2	1	1	1	2	1	1	0	0	1	0	1.35	2.12	2.59	112.5	4.55	1.76	49.15
60.1	0	36	2	1	1	1	1	0	1	1	1	0	0	1	1.38	8.6	316.88	6.62	0.77	48
24.4	0	37	2	1	1	1	2	0	1	1	1	0	0	1.4	1.55	2.28	205.41	4.22	1.85	43.39
59	0	33	2	1	1	1	1	0	1	0	0	0	0	1.7	1.39	1.91	158.38	3.77	1.97	50.5
29.3	0	42	2	1	1	3	3	1	1	1	1	0	0	2.9	1.35	2.4	355.37	2.91	1.21	37.22
73.2	0	50	2	1	1	1	1	0	1	0	0	0	0	1.1	1.32	6.47	156.12	9	1.39	36.44
62.9	0	49	2	1	1	1	3	1	1	0	0	0	0	2	2.15	5.02	273.33	6.02	1.2	50.39
14.3	0	46	2	1	1	1	1	0	1	0	0	0	0	1.3	1.56	2.33	82.58	3.61	1.55	43.41
51.6	0	45	2	2	1	1	1	0	1	0	0	0	0	1.3	1.33	2	98.66	5.99	2.99	45.39
62	0	48	2	2	1	1	2	1	1	0	0	0	0	1.5	1.63	1.86	109.57	4.27	2.3	47.66
10.3	1	48	1	1	1	1	3	0	1	0	0	0	0	4	1.54	4.19	183.33	4.52	1.08	38.35
25.9	0	48	1	1	1	1	2	0	1	1	1	0	0	1.6	1.02	4.47	316.38	5.19	1.16	37.37
25.4	0	47	1	1	1	1	1	1	1	1	1	0	0	1.9	1.37	2.08	124.21	3.95	1.9	38.14
62.5	0	44	2	1	1	1	2	0	1	0	0	0	0	1.3	1.84	1.72	120.13	2.57	1.49	49.4
14.4	0	45	2	1	1	1	1	1	1	1	1	1	0	2.8	1.22	3.32	188.24	4.51	1.36	41
52.4	0	40	2	1	1	1	1	0	1	1	1	0	0	1.3	1.18	14.26	202.13	13.4	0.94	42.1
10.1	0	50	2	1	1	2	1	0	1	0	0	0	0	1.4	1.53	1.36	48.62	2.47	1.81	41.71
32.9	1	48	2	2	1	1	3	0	1	0	0	0	0	1.45	1.26	1.82	156.47	3.09	1.7	40.59
88.3	0	48	2	1	1	1	1	1	1	1	1	0	0	0.6	1.49	3.64	186.21	5.28	1.45	47.86
4.7	1	50	2	1	1	2	3	0	1	0	0	0	0	1.9	1.22	2.12	202.19	3.88	1.83	41.62
57	0	49	2	1	1	1	1	1	1	0	0	0	0	1.3	1.29	2.3	84.85	3.03	1.32	44.64
5.5	1	46	2	2	1	1	3	1	1	0	0	0	0	1.6	1.27	5.09	169.23	5.96	1.17	44.72
86.3	0	45	2	1	1	1	1	0	1	0	0	0	0	2.7	1.44	2.88	50.19	7.52	2.61	41.26
53.4	0	47	2	1	1	2	1	0	1	1	1	0	0	1.1	1.36	2.04	156.97	3.37	1.65	49.98
58.6	0	45	2	1	1	1	1	0	1	0	0	0	0	1.5	1.68	5.1	194.79	4.9	0.96	47.99
85.6	0	43	1	1	1	1	1	0	1	0	0	0	0	0.7	2.01	1.59	105.42	2.64	1.66	51.71
59.3	0	45	2	1	1	1	1	0	1	0	0	0	0	1.6	1.38	2.79	163.69	4.68	1.68	48.55
24	0	44	2	2	1	1	1	0	1	1	1	0	0	1.7	1.37	2.76	127.27	3.64	1.32	44.77
49.3	0	39	1	2	1	1	1	1	1	0	0	0	0	1.2	1.59	3.72	128.85	5.81	1.56	45.37
26.2	0	40	2	2	1	1	3	0	1	1	1	0	0	1.9	1.42	2.41	101.35	3.57	1.48	43.6
23.8	0	39	1	1	1	1	1	1	1	0	0	0	0	2.9	1.47	1.31	196.26	1.4	1.07	39.6
61.3	0	34	2	2	1	1	1	0	1	0	0	0	0	1.32	1.42	1.59	129.71	2.78	1.75	42.21
11.6	1	36	2	1	1	1	3	0	1	0	0	1	0	1.7	2.29	3.62	126.53	5.32	1.47	47.98
36	0	35	2	1	1	1	1	1	1	1	1	0	0	1.6	1.39	0.83	69.42	2.7	3.27	51.4
61	0	48	2	1	1	1	1	0	1	0	0	0	0	0.9	1.75	4.27	237.39	4.91	1.15	42.56
62.3	0	47	2	1	1	1	3	0	1	0	0	0	0	1.9	1.4	2.58	189.79	6.06	2.35	35.36
36.7	0	49	2	1	1	1	1	1	1	0	0	0	0	1.5	1.29	1.21	106.02	2.62	2.16	44.9
52.5	0	37	2	1	1	1	1	0	1	0	0	0	0	1.3	1.57	2.72	101.75	4.65	1.71	44.64
35.5	0	36	2	1	1	1	1	0	1	0	0	0	0	1.4	1.3	2.46	123.53	3.34	1.36	45.37
49.1	0	48	2	1	1	2	1	0	1	0	0	0	0	1.6	1.56	2.85	108.47	5.05	1.77	45.64
3.1	1	46	2	1	1	1	2	0	1	0	0	0	0	2.1	0.9	9.81	454.81	10.2	1.04	40.06
86.3	0	39	1	1	1	1	1	1	1	0	0	0	0	0.5	1.73	3.26	98.45	4.2	1.29	49.78
35.3	1	35	1	1	1	1	1	0	1	0	0	0	0	1	1.59	0.99	71.95	2.99	3.03	46.47
25.3	1	45	2	1	1	1	3	1	1	0	0	0	0	3.1	1.19	3.52	148.98	5.17	1.47	35.38
12.6	0	49	2	1	1	1	1	1	1	0	0	0	0	2.3	1.28	4.95	256.73	5.15	1.04	43.2
60.8	0	43	2	1	1	1	2	1	1	0	0	0	0	1.3	1.6	3.15	148.15	5.96	1.89	46.52
24.7	0	46	1	1	1	1	2	0	1	1	1	0	0	2.9	1.5	1.87	127.18	3.64	1.95	34.82
46.6	0	43	2	1	1	1	1	0	1	0	0	0	0	1.4	1.37	7.15	169.9	7.36	1.03	53.64
97.8	0	38	1	1	1	1	1	1	1	0	0	0	0	0.8	1.29	2.5	211.11	3.38	1.35	49.74
30.2	0	42	2	1	1	1	3	1	1	1	1	1	0	2.5	1.57	2.59	131.79	3.91	1.51	44.53
39.3	0	37	1	1	1	3	1	1	1	1	1	0	0	1.5	1.45	4.33	189.14	7.57	1.75	38.1
61	0	35	1	1	1	1	1	0	1	0	0	0	0	0.9	1.24	4.67	224.64	6.45	1.38	46.81
60.9	0	50	1	1	1	1	1	1	1	0	0	0	0	1.7	1.32	2.25	166.28	3.87	1.72	50.49
17.6	1	49	2	2	1	3	1	1	1	0	0	0	0	1	1.57	2.68	154.46	3	1.12	48.86
85.3	0	47	1	1	1	2	1	1	1	0	0	0	0	1	1.9	1.38	118.13	2.66	1.93	48.05
31.9	0	50	1	1	1	1	1	1	1	0	0	0	0	2	1.66	3.21	123.33	4.81	1.5	48.06
5	1	47	1	1	1	1	3	0	1	0	0	0	0	3.8	1.7	4.02	83.05	7.11	1.77	48.62
25.7	0	48	1	1	1	1	1	1	1	0	0	0	0	2.5	1.12	4.72	194.44	4.25	0.9	45.1
46	0	37	1	1	1	1	1	0	1	0	0	0	0	1.4	2.03	2.41	89.02	3.95	1.64	48.79
42.7	0	48	2	1	1	1	2	1	1	1	1	0	0	1.5	1.25	1.48	118.25	3.89	2.63	47.2
61.5	0	39	1	1	1	1	1	1	1	0	0	0	0	1.8	1.9	1.92	133.33	2.54	1.32	44.76
54.6	0	36	1	1	1	1	1	0	1	0	0	0	0	1.2	1.97	3.18	120	5.09	1.6	50.19
29.1	0	40	2	1	1	2	1	1	1	1	1	0	0	1.8	1.58	2.47	146.62	3.66	1.48	44.6
24.6	0	38	1	1	1	1	1	1	1	1	1	0	0	1.6	1.55	2.67	134.64	4.08	1.53	49.55
24.8	0	37	2	1	1	1	1	0	1	1	1	0	0	1.6	1.54	1.83	162.5	2.92	1.6	44.3
48.7	0	35	1	1	1	1	1	1	1	0	0	0	0	1.2	1.92	1.88	138.46	3.43	1.82	48.68
7.6	0	38	2	1	1	1	3	0	1	0	0	0	0	2.4	1.05	5.73	379.35	5.27	0.92	28.5
78	0	50	1	1	1	1	3	0	1	0	0	0	0	1.54	1	2	265.05	2.06	1.03	41.58
101.3	0	48	1	1	1	2	1	0	1	1	1	1	0	0.9	1.24	5.14	174.29	5.4	1.05	44.55
60.1	0	50	2	1	1	1	2	1	1	0	0	0	0	1.91	1.1	2.14	116.67	4.87	2.28	40.17
36.7	1	49	1	1	1	1	3	1	1	0	0	0	0	0.6	1.82	4.65	595.35	2	0.43	44
59.1	0	49	1	1	1	1	2	1	1	0	0	0	0	0.8	1.48	1.11	135.5	1.88	1.69	47.51
60.5	0	48	1	2	1	1	1	0	1	0	0	0	0	1.1	1.47	5.26	193.1	7.62	1.45	51.37
86.6	0	46	2	1	1	1	1	0	1	0	0	0	0	0.4	1.43	4.27	219.53	5.47	1.28	43.93
62.2	0	47	2	1	1	1	1	0	1	0	0	0	0	1.4	1.75	3.45	146.92	4.49	1.3	48.86
49.8	0	49	1	1	1	1	1	1	1	0	0	0	0	2.1	1.83	2.39	119.31	4.83	2.02	47.89
75	0	46	1	1	1	1	1	1	1	0	0	0	0	1.4	1.48	2.19	184.89	3.05	1.39	47.59
62.9	0	46	1	1	1	1	2	1	1	0	0	0	0	1.7	1.35	1.41	136.15	3.01	2.13	48.84
61	0	47	2	1	1	1	2	1	1	0	0	0	0	1.7	1.98	2.64	111.6	4.77	1.81	46.67
39.7	0	48	2	1	1	1	3	1	1	0	0	1	0	1.9	1.29	4.1	158.57	5.74	1.4	45.04
61.3	0	45	1	1	1	1	1	1	1	0	0	0	0	1.1	1.68	3.67	98.39	6.82	1.86	48.18
14	0	49	1	1	1	1	2	1	1	1	1	0	0	2	1.5	2.44	179.81	2.54	1.04	49.67
17.7	0	48	1	2	1	1	3	1	1	1	1	1	0	2.9	1.59	3.3	90.63	6.34	1.92	37.68
47.1	0	46	1	1	1	1	1	0	1	0	0	0	0	1.5	1.28	2.03	173.37	4.04	1.99	45.7
61	0	42	2	1	1	1	1	1	1	0	0	0	0	1.1	1.68	1.72	192.78	3.09	1.8	41.67
28.3	1	42	2	1	1	1	1	1	1	0	0	0	0	1.23	1.54	1.98	110.9	3.09	1.56	45.29
43.8	0	44	1	1	1	1	2	1	1	1	1	0	0	2.3	1.85	1.96	253.33	1.76	0.9	44.01
73	0	41	2	1	1	1	1	1	1	0	0	0	0	1.3	1.9	3.19	159.03	4.59	1.44	49.38
74.3	0	39	2	1	1	1	1	1	1	0	0	0	0	1.58	1.42	3.71	134.62	5.78	1.56	39.9
61.8	0	38	1	1	1	1	1	1	1	0	0	0	0	1.16	1.7	3.08	127.78	5.54	1.8	48.66
28	0	41	1	1	1	2	1	1	1	1	1	0	0	1.6	1.3	3.78	144.03	6.01	1.59	51.88
14.3	1	36	1	1	1	2	1	1	1	0	0	0	0	1.4	1.23	6.65	477.27	4.39	0.66	45.64
80.5	0	30	2	2	1	1	1	0	1	0	0	0	0	0.9	1.34	1.87	148.39	2.9	1.55	48.43
78.7	0	48	1	1	1	1	2	0	1	0	0	0	0	0.7	1.19	1.78	89.07	3.26	1.83	40.66
47.7	0	50	1	1	1	3	1	0	1	0	0	0	0	1.6	1.22	2.85	214.4	3.56	1.25	43.35
66.1	0	48	2	1	1	1	1	0	1	0	0	0	0	1.39	1.65	1.83	142.18	2.69	1.47	41.14
84.9	0	45	2	1	1	1	2	1	1	0	0	0	0	1.3	1.39	2.9	146.33	5.13	1.77	46.33
23.9	0	50	1	1	1	1	1	1	1	0	0	0	0	1.4	1.63	2.13	94.08	3.23	1.52	51
34.9	0	49	2	1	1	1	1	1	1	1	1	0	0	1.5	1.66	1.71	80.95	2.87	1.68	41.27
36.4	0	48	2	1	1	1	1	1	1	0	0	0	0	1.6	1.64	2.24	205	2.24	1	50.35
15.9	0	50	1	1	1	1	3	1	1	1	1	0	0	5.7	1.67	2.65	138.55	4.75	1.79	39.93
56.9	0	47	1	1	1	1	1	1	1	1	1	0	0	1.4	1.68	1.38	90.94	3.65	2.65	50.88
61.7	0	46	1	1	1	1	1	1	1	0	0	0	0	1	1.99	1.81	59.5	6.58	3.63	43.73
13	0	49	1	1	1	1	3	1	1	1	1	0	0	2.1	1.2	2.37	181.08	4.39	1.85	41.5
53.5	0	44	2	1	1	1	3	1	1	0	0	0	0	2.35	1.19	3.87	131.01	4.99	1.29	44.65
51.9	0	46	1	1	1	1	1	1	1	0	0	0	0	4.7	0.68	6.79	322.6	9.92	1.46	34.22
85.5	0	43	1	1	1	2	1	1	1	0	0	0	0	0.7	1.61	5.73	326.67	3.44	0.6	45.52
33.4	0	47	1	1	1	2	1	1	1	1	1	0	0	1.7	1.25	2.58	93.73	6.57	2.55	46.1
6.6	0	49	2	1	1	3	2	0	1	1	1	0	0	1.8	1.26	2.63	157.08	5.94	2.26	36.3
40.5	0	46	1	1	1	1	1	0	1	1	1	0	0	2.6	1.21	2.66	262.1	3.3	1.24	51.08
61.2	0	43	1	1	1	1	1	1	1	0	0	0	0	1.7	1.74	3.13	173.03	4.76	1.52	49.87
47.5	0	45	1	1	1	1	1	1	1	0	0	0	0	1.5	1.64	2.24	197.02	3.76	1.68	43.87
86	0	41	1	1	1	1	2	1	1	0	0	0	0	1.7	1.86	2.32	119.28	5.17	2.23	50.03
37.7	0	44	1	1	1	1	1	0	1	0	0	0	0	1.6	1.51	1.97	130.65	3.67	1.86	46.58
29	1	42	1	1	1	1	3	0	1	0	0	0	0	1.3	1.2	3.83	148.91	5.25	1.37	45.45
14.2	0	44	2	1	1	1	1	1	1	0	0	0	0	1.8	1.68	1.78	111.05	3.07	1.72	40.35
61.3	0	39	1	1	1	1	1	0	1	0	0	0	0	1.6	1.55	3.25	197.62	2.73	0.84	46.63
36.9	0	41	1	1	1	1	1	1	1	0	0	0	0	1.4	1.53	3	108.56	6.67	2.22	46.6
4.2	0	50	1	1	1	1	1	0	1	0	0	0	0	1.1	1.13	2.63	92.21	4.05	1.54	46.03
58.2	0	50	1	1	1	1	2	1	1	0	0	0	0	2.2	1.12	4.01	164.95	3.89	0.97	46.04
11.2	1	50	1	1	1	1	2	0	1	0	0	0	0	1.6	1.46	1.66	249.44	1.48	0.89	43.51
60.1	0	48	1	1	1	1	2	1	1	0	0	0	0	2.1	1.67	2.04	111	4.27	2.09	45.26
61.7	0	47	1	1	1	2	3	0	1	0	0	0	0	1.4	1.88	1.84	100.99	3.71	2.02	51.84
24.7	0	50	1	1	1	1	1	1	1	0	0	0	0	1.9	1.37	6.94	270.93	5.97	0.86	48.2
19.5	1	48	1	1	1	1	2	0	1	0	0	0	0	1.8	1.82	3.08	211.96	2.83	0.92	46.05
97	0	43	1	1	1	1	3	1	1	0	0	0	0	0.8	1.55	2.57	197.97	3.8	1.48	49.34
48.3	0	47	1	1	1	1	1	0	1	0	0	0	0	1.6	1.62	1.27	120.4	2.55	2.01	46.79
49.7	0	46	2	1	1	1	1	1	1	0	0	0	0	1	1.36	2.94	142.86	3.5	1.19	44.88
38.1	1	45	1	1	1	1	3	1	1	0	0	0	0	1.7	1.38	4.04	271.91	3.6	0.89	40.19
2.9	1	48	1	1	1	1	3	1	1	0	0	0	0	7.3	0.63	5.17	363.91	6.88	1.33	30.05
31.6	0	48	1	1	1	1	3	1	1	1	1	0	0	2.5	1.47	1.82	73.01	2.96	1.63	40.3
37.2	0	47	1	1	1	1	1	0	1	0	0	0	0	1.6	1.48	1.44	138.53	3.15	2.18	42.9
36.2	0	41	1	1	1	1	2	0	1	0	0	0	0	1.8	1.2	3.45	258.93	1.93	0.56	39.8
60.9	0	43	1	1	1	1	2	1	1	0	0	0	0	1.02	1.21	2.82	136.65	4.54	1.61	36.26
16.7	1	45	1	1	1	1	3	1	1	0	0	1	0	1.3	1.03	1.25	162.84	2.29	1.83	45.5
73.8	0	41	1	1	1	3	1	1	1	0	0	0	0	1	1.65	3.1	172.02	6.75	2.18	49.22
25.4	0	46	1	1	1	1	3	1	1	1	1	0	0	1.7	1.51	5.73	139.27	10.95	1.91	38.5
53.5	0	40	2	1	1	1	1	1	1	0	0	0	0	1.73	1.43	4.05	70.07	5.55	1.37	39.49
48.9	0	41	1	1	1	2	1	1	1	0	0	0	0	1.6	1.72	4.04	157.81	5.17	1.28	46.61
61.8	0	40	1	2	1	2	1	0	1	0	0	0	0	1.7	1.83	4.45	185.16	8.1	1.82	50.35
38.1	0	41	1	1	1	1	1	1	1	0	0	0	0	1.5	1.23	2.41	231.58	4.58	1.9	45.2
60.9	0	39	1	1	1	1	2	0	1	0	0	0	0	1.6	1.09	2.6	359.6	3.92	1.51	41.56
85.5	0	35	1	1	1	1	1	1	1	0	0	0	0	1	2.04	3.58	123.02	4.51	1.26	45.12
51.6	0	38	1	1	1	1	3	0	1	0	0	0	0	1.8	1.2	2.39	148.34	3.61	1.51	38.6
61	0	35	1	1	1	1	1	1	1	0	0	0	0	1.2	1.57	2.31	87.34	5.29	2.29	44.33
14.2	0	49	1	1	1	1	3	1	1	0	0	0	0	1.8	1.22	3.27	110.75	6.08	1.86	40.24
102.8	0	48	1	1	1	1	2	1	1	0	0	1	0	1.1	1.25	2.18	125.14	3.81	1.75	41.45
19.6	1	46	2	1	1	2	1	1	1	0	0	1	0	1.4	0.93	2.71	150.67	6.1	2.25	39.64
61.8	0	47	2	1	1	1	2	1	1	0	0	0	0	2.4	1.43	1.97	128.57	3.45	1.75	38.8
73	0	47	1	1	1	1	2	1	1	0	0	0	0	1.6	1.33	1.65	196.45	2.33	1.41	45.47
31.6	1	47	1	1	1	1	1	0	1	0	0	0	0	2.2	1.18	2.37	87.02	3.1	1.31	42.44
45.5	0	49	1	1	1	1	2	1	1	1	1	0	0	2.1	1.32	3.41	173.47	3.34	0.98	44.7
85.4	0	44	1	1	1	1	1	1	1	0	0	0	0	0.8	1.59	1.47	99.13	3.38	2.3	49.18
85.6	0	44	1	1	1	1	1	1	1	0	0	0	0	0.5	1.6	2.42	136.49	3.58	1.48	51.25
35.5	0	48	2	1	1	1	1	1	1	0	0	0	0	2.1	1.06	3.02	127.51	5.7	1.89	43.94
48.7	0	46	1	1	1	1	1	1	1	0	0	0	0	1.7	1.55	2.85	66.06	6.29	2.21	49.93
73.2	0	45	1	1	1	1	2	1	1	0	0	0	0	1.1	1.8	3.86	201.16	6.68	1.73	53.01
41.5	0	47	1	1	1	1	1	1	1	0	0	0	0	2	1.82	2.08	118.69	4.11	1.98	42.25
13.4	1	47	2	1	1	1	1	0	1	0	0	0	0	3	0.93	7.44	344.23	11.6	1.56	37.4
29.8	0	47	2	1	1	1	1	0	1	0	0	0	0	1.5	1.2	2.6	192.37	3.41	1.31	44
49.7	0	41	2	1	1	2	1	0	1	0	0	0	0	0.7	1.31	2.25	118.71	3.13	1.39	44.51
37.2	0	45	1	1	1	1	2	1	1	0	0	0	0	2	1.39	1.67	233.33	2.05	1.23	43.3
61.3	0	43	2	1	1	1	1	1	1	0	0	0	0	2.5	1.53	3.84	278.02	3.49	0.91	43.68
35.3	0	44	1	1	1	1	2	0	1	0	0	0	0	2.4	1.18	2.14	115.13	3.25	1.52	47.6
61.3	0	42	1	1	1	1	1	0	1	0	0	0	0	1.4	1.85	1.69	103.54	3.34	1.98	50.12
80.2	0	39	1	1	1	1	2	0	1	1	1	1	0	0.7	1.24	3.39	117.13	6.13	1.81	47.99
20.1	1	44	2	1	1	1	2	1	1	1	1	0	0	1.5	1.32	2.79	209.89	5.08	1.82	44.99
70.1	0	38	1	1	1	1	1	0	1	0	0	0	0	1.3	1.16	3.09	275.78	4.98	1.61	35.56
52.1	0	42	2	1	1	1	2	1	1	1	1	1	0	2	1.38	2.01	134.78	2.78	1.38	40.16
97.9	0	35	1	1	1	1	1	1	1	0	0	0	0	0.7	1.43	1.91	157.42	2.96	1.55	44.56
65.8	0	36	2	1	1	1	1	0	1	0	0	0	0	1.53	1.87	2.59	110.67	3.89	1.5	51.93
73	0	50	1	2	1	1	1	1	1	0	0	0	0	1.8	1.38	2.44	113.33	3.3	1.35	38.29
60.9	0	49	1	1	1	1	1	0	1	0	0	0	0	1.19	1.54	2.38	124.24	4.71	1.98	48.82
39.4	0	50	1	1	1	1	3	1	1	0	0	0	0	2.1	0.75	3.69	211.19	4.94	1.34	39.39
86.1	0	45	1	1	1	2	1	1	1	0	0	0	0	1.1	1.75	6	181.37	6.12	1.02	49.11
24.9	0	49	1	1	1	3	2	0	1	1	1	1	0	2.6	1.43	1.59	90.76	2.93	1.84	43.78
49.3	0	45	1	1	1	1	1	1	1	0	0	0	0	1.5	1.47	5.72	267.37	5.43	0.95	48.37
76.8	0	45	2	1	1	1	1	1	1	0	0	0	0	0.9	1.57	3.12	119.64	5.24	1.68	49.14
50.4	0	47	1	1	1	1	2	0	1	1	1	0	0	3.5	1.62	4.03	251.26	4.8	1.19	49.35
24.7	0	47	1	1	1	1	3	1	1	1	1	0	1	2.2	0.92	5.54	228.48	8.37	1.51	31.8
59.6	0	41	1	1	1	1	1	1	1	0	0	0	0	2.21	1.93	1.47	103.48	1.69	1.15	44.66
9.3	0	46	1	1	1	1	1	0	1	0	0	0	0	2.3	2.35	2.41	130.81	4.78	1.98	48.67
17.2	0	45	2	1	1	1	3	1	1	1	1	0	0	2.5	1.19	1.19	134.74	2.26	1.9	37
48.9	0	41	1	1	1	1	1	0	1	0	0	0	0	1.7	1.38	2.49	189.08	4.34	1.74	42.66
12.1	0	42	1	1	1	1	3	0	1	0	0	0	0	2.1	1.61	3.99	194.74	6.07	1.52	44.55
84.9	0	50	1	1	1	1	1	1	1	0	0	0	0	1.5	1.58	1.92	129.15	3.82	1.99	47.22
95.2	0	48	1	1	1	2	1	0	1	0	0	0	0	1	1.07	2.76	157.59	5.28	1.91	41.79
61.8	0	50	1	1	1	2	1	1	1	0	0	0	0	1.6	1.21	3.13	216.8	3.91	1.25	39.02
47.8	0	47	1	1	1	2	1	0	1	0	0	0	0	1	1.32	3.58	211.54	3.72	1.04	45.7
60	0	50	1	1	1	1	2	0	1	0	0	0	0	1.2	1.17	2.34	207.98	4.39	1.88	48.09
38.1	0	48	1	1	1	1	1	1	1	0	0	0	0	0.8	1.87	2.24	75.71	6.26	2.8	50.35
94.5	0	46	1	1	1	1	2	0	1	0	0	0	0	0.8	1.29	5.63	155.56	6.08	1.08	41.86
60.6	0	49	1	1	1	1	1	1	1	0	0	0	0	1.4	1.53	3.53	232.69	3.67	1.04	50.8
49.8	0	49	1	1	1	1	1	1	1	0	0	0	0	1.7	1.75	4.1	107.36	6.68	1.63	50.23
61.6	0	47	2	1	1	1	1	0	1	0	0	0	0	2.5	0.88	29.06	207.84	14.82	0.51	25.7
24.7	0	49	2	1	1	1	1	0	1	0	0	0	0	1.6	2.08	2.54	168.06	3.66	1.44	51.33
58.2	0	46	1	1	1	1	1	0	1	0	0	0	0	0.9	1.63	2.96	140.29	4.11	1.39	47.15
24.7	0	49	2	2	1	1	1	1	1	1	1	0	0	2.4	1.45	2.2	84.83	4.64	2.11	38.46
38.4	0	47	1	1	1	1	1	0	1	0	0	0	0	1.8	1.45	3.55	159.33	7.42	2.09	46.5
72.7	0	45	2	1	1	2	1	0	1	0	0	0	0	1.8	1.78	3.71	263.01	2.71	0.73	55.14
38.8	0	47	1	1	1	1	1	1	1	0	0	0	0	1.5	1.76	1.65	82.13	4.33	2.63	45.92
37.2	0	48	2	1	1	1	2	1	1	1	1	0	0	2.1	1.27	1.59	114.29	3.46	2.17	41.2
84.8	0	43	1	1	1	1	1	1	1	0	0	0	0	0.8	1.7	2.21	160	2.32	1.05	50.87
61.7	0	45	1	1	1	1	3	0	1	0	0	0	0	2	1.63	1.17	139.32	2.74	2.34	38.66
9.2	1	48	1	1	1	1	3	0	1	1	1	0	0	2.1	1.21	2.39	151.11	5.38	2.25	41.21
70.5	0	44	1	1	1	2	1	1	1	0	0	0	0	1.2	1.54	1.89	117.75	3.19	1.69	45.33
61.5	0	43	1	1	1	1	1	0	1	0	0	0	0	1.7	1.19	3.42	169.89	3.18	0.93	44.14
39.5	0	45	1	1	1	1	2	0	1	0	0	0	0	2.5	1.68	3.75	182.29	3.6	0.96	35.59
63.1	0	43	1	1	1	1	3	1	1	0	0	0	0	3.44	0.94	3.2	156.57	5.6	1.75	34.5
68.7	0	43	1	1	1	1	1	1	1	0	0	0	0	1.3	1.33	2.1	107.89	3.19	1.52	45.76
24.9	0	46	1	2	1	2	3	0	1	1	1	0	0	2.7	2.04	0.91	69.54	1.8	1.97	41.8
86.2	0	41	1	1	1	1	1	1	1	0	0	0	0	2	2.01	3.05	135.9	3.57	1.17	47.82
59.6	0	43	2	1	1	1	2	1	1	0	0	0	0	1.3	1.51	3.6	186.24	3.92	1.09	48.16
23.2	0	44	2	1	1	1	2	0	1	0	0	0	0	1.9	1.45	1.94	136.2	3.16	1.63	46
18.6	1	41	1	1	1	3	1	0	1	0	0	0	0	1.17	2.06	2.02	194.55	2.22	1.1	40.65
82.7	0	40	1	1	1	1	2	1	1	0	0	0	0	1	1.56	2.27	74.9	5.96	2.63	48.73
20.8	0	45	1	1	1	1	1	1	1	1	1	0	0	1.9	1.93	2.16	145.45	4.75	2.2	46.07
52	0	41	1	1	1	1	3	1	1	0	0	0	0	1.6	1.41	1.8	201.54	3.51	1.95	47.24
85.6	0	48	2	1	1	1	1	1	1	0	0	0	0	1.8	1.3	4.29	248	4.29	1	44.45
60	0	49	1	1	1	1	2	0	1	0	0	0	0	1.64	1.47	1.98	177.44	2.63	1.33	48.18
37.8	0	50	1	1	1	3	1	1	1	1	1	0	0	1.5	1.42	0.85	65.15	2.25	2.64	43.6
25.2	0	50	1	1	1	1	2	1	1	1	1	0	0	2.3	1.37	3.85	370.73	3.16	0.82	38.33
9	1	47	1	1	1	1	3	0	1	0	0	0	0	2.5	1.28	1.51	91.02	2.52	1.67	39.61
37.6	0	48	1	1	1	1	1	1	1	1	1	0	0	1.5	1.56	2.56	62.93	5.24	2.05	40.8
43.8	1	47	1	1	1	1	2	0	1	0	0	0	0	1.7	1.18	2.18	126.32	3.31	1.52	49.72
26.5	0	49	1	1	1	1	3	0	1	1	1	0	0	2	1.27	3.7	151.81	6.14	1.66	42.08
37.8	0	47	1	1	1	2	1	0	1	0	0	0	0	2.1	1.44	2.9	448.51	2.93	1.01	44.1
10.2	0	40	2	1	1	2	2	0	1	0	0	0	0	2.1	1.81	7.99	135.87	7.35	0.92	48.73
23.6	0	45	2	2	1	1	2	1	1	1	1	1	0	2.8	0.97	2.38	129.41	4.45	1.87	37.23
43.8	0	43	1	1	1	3	1	1	1	0	0	0	0	2	1.6	2.2	139.46	4.07	1.85	45.93
40.2	0	43	1	1	1	1	3	1	1	0	0	0	0	1.7	1.5	3.84	187.04	4.15	1.08	48.1
27.7	0	42	1	1	1	1	1	1	1	1	1	0	0	2.4	1.22	2.98	154.04	4.8	1.61	37.36
15.5	0	39	2	2	1	1	1	0	1	0	0	0	0	2.1	1.1	2.13	171.82	3.85	1.81	45.21
49.5	0	36	1	1	1	1	1	1	1	0	0	0	0	1.1	1.92	3.19	179.49	4.98	1.56	50.51
65.4	0	34	1	1	1	1	1	0	1	0	0	0	0	1.18	1.76	3.15	129.84	6.01	1.91	42.28
12.5	0	38	1	1	1	1	1	1	1	1	1	0	0	1.8	1.16	2.47	109.47	4.7	1.9	38.9
61.6	0	50	2	1	1	1	1	1	1	0	0	0	0	1.5	1.61	7.36	269.23	5.74	0.78	52.72
61.8	0	49	1	1	1	1	1	0	1	0	0	0	0	1.5	1.56	1.13	83.55	2.61	2.31	53.31
73.2	0	46	1	1	1	2	1	1	1	0	0	0	0	1.9	1.61	1.87	188.52	3.9	2.09	49.49
23	0	50	1	1	1	3	2	0	1	1	1	0	0	2.9	1.62	2.24	184.07	4.07	1.82	37.32
39	0	47	1	1	1	1	3	1	1	0	0	0	0	2.6	1.41	2.14	119.44	3.86	1.8	44.77
54.2	0	44	1	1	1	1	1	1	1	0	0	0	0	2.57	1.21	5.29	148.91	4.87	0.92	41.53
62.8	0	45	1	1	1	1	3	1	1	0	0	0	0	1.2	1.62	2	111.19	2.68	1.34	44.06
28.9	0	48	2	1	1	2	1	0	1	1	1	0	0	1.4	1.54	1.11	150.27	2.03	1.83	46.48
60.1	0	44	1	1	1	1	1	0	1	0	0	0	0	1.9	1.29	2.4	202.88	3.34	1.39	29.57
85.1	0	43	1	1	1	1	1	0	1	0	0	0	0	0.6	2.18	1.75	102.23	3.91	2.24	44.59
32	0	47	1	1	1	1	3	0	1	1	1	0	0	3.1	1.17	2.13	354.08	2.09	0.98	40.62
24.3	0	45	1	1	1	1	3	1	1	1	1	0	0	3.1	1.24	5.94	384.26	6.42	1.08	45.94
25.9	0	45	2	1	1	1	1	0	1	1	1	0	0	1.8	1.33	2.56	246.34	2.1	0.82	39.22
25	0	43	2	1	1	2	1	1	1	0	0	0	0	1.9	1.44	1.72	91.33	3.38	1.96	42.6
65.4	0	40	2	1	1	1	1	0	1	0	0	0	0	1.6	1.62	3.92	213.95	5.06	1.29	48.78
24.3	0	43	1	1	1	1	3	1	1	1	1	0	0	5.1	1.37	1.51	144.79	2.89	1.92	37.77
49.6	0	39	1	1	1	1	2	0	1	0	0	0	0	2.8	1.27	1.56	98.92	4.33	2.77	37.44
85.4	0	36	1	1	1	1	1	0	1	0	0	0	0	0.9	1.56	1.8	120.87	4.13	2.3	38.03
30.7	0	37	1	1	1	1	1	1	1	1	1	0	0	1.8	1.21	1.8	120.57	3.77	2.09	39.7
84.3	0	48	1	1	1	1	1	1	1	0	0	0	0	1.3	1.56	2.4	140.68	4.24	1.77	45.64
6.5	0	47	1	1	1	1	2	1	1	0	0	0	0	0.2	1.45	2.42	169.23	3.46	1.43	44.53
62.7	0	49	2	1	1	1	2	0	1	0	0	0	0	2.1	1.44	2.12	173.38	3.26	1.54	42.6
63.5	0	47	1	1	1	1	3	1	1	0	0	0	0	2	1.48	3.5	142.55	6.58	1.88	37.12
33.8	0	49	2	1	1	2	1	0	1	1	1	0	0	1.4	1.01	4.05	297.12	4.21	1.04	41.1
43.8	1	47	1	1	1	1	1	0	1	0	0	0	0	1.7	1.58	2.67	125.31	4.33	1.62	47.93
37	0	48	1	2	1	2	1	1	1	0	0	0	0	2	1.16	2.15	182.76	3.74	1.74	37.2
10.1	0	49	2	1	1	1	1	1	1	1	1	0	0	2.3	1.58	2.79	128.48	4.21	1.51	43.91
37.3	0	47	2	1	1	1	1	0	1	0	0	0	0	3.4	1.64	2.51	193.91	2.89	1.15	45.32
12.9	1	47	1	1	1	1	2	0	1	0	0	0	0	2.3	1.09	1.86	151.03	4.53	2.43	37.84
11.8	1	44	1	1	1	3	1	1	1	0	0	0	0	1.1	1.86	2.6	101.5	5.19	2	42.57
19.6	0	48	2	1	1	1	3	1	1	1	1	1	0	2	1.8	3.51	146.62	5.19	1.48	45
23.6	1	44	1	1	1	1	2	1	1	0	0	0	0	1.5	1.15	1.29	129.7	2.13	1.65	42.95
61.8	0	42	1	1	1	1	1	0	1	0	0	0	0	1.24	2.04	1.82	68.12	3.77	2.07	43.47
22.5	0	45	1	1	1	1	2	1	1	1	1	0	0	1.7	1.55	2.35	163.45	4.63	1.97	47.37
1.1	1	40	1	1	1	1	2	0	1	0	0	0	0	1.6	1.58	6.14	355.81	2.64	0.43	47.16
21.6	1	47	1	1	1	1	2	0	1	0	0	0	0	1	1.18	1.39	122.84	3.23	2.32	43.37
61.5	0	49	1	1	1	1	2	0	1	0	0	0	0	0.9	1.53	4.53	192.4	7.74	1.71	41.86
53.7	0	48	1	1	1	2	1	1	1	0	0	0	0	1.5	2.19	2.11	202.45	3.44	1.63	46.07
5.6	0	43	1	2	1	1	3	0	1	0	0	0	0	1.4	1	4.47	136.89	4.6	1.03	39.55
85	0	44	1	1	1	1	1	1	1	0	0	0	0	1.2	1.92	3.16	92.72	4.77	1.51	46.94
61.3	0	45	1	1	1	1	2	1	1	0	0	0	0	1.92	1.33	1.54	170.66	3.73	2.42	41.81
36.3	0	47	1	1	1	1	1	0	1	0	0	0	0	1.5	1.72	2.62	133.33	4.88	1.86	44.7
43.1	0	44	2	1	1	1	1	0	1	0	0	0	0	2.4	1.98	2.76	172.55	2.82	1.02	48.88
61.7	0	41	1	1	1	1	1	1	1	0	0	0	0	3.03	1.18	0.85	90.72	2.02	2.37	41.04
86.1	0	36	1	1	1	1	1	1	1	0	0	0	0	1.7	1.55	2.26	169.79	2.17	0.96	48.29
86.3	0	50	2	1	1	1	3	1	1	0	0	0	0	0.9	1.69	9.02	155.83	29.42	3.26	50.59
46.7	0	49	1	1	1	1	3	1	1	1	1	0	0	3.1	1.59	1.13	207.5	0.9	0.8	43.06
4.9	1	46	1	1	1	1	3	0	1	0	0	0	0	2.4	1.05	1.91	179.56	2.62	1.37	35.06
49.6	0	49	1	1	1	2	1	1	1	0	0	0	0	1.3	1.5	1.82	139.78	3.29	1.81	47.05
60.4	0	47	1	1	1	1	2	1	1	0	0	0	0	1.3	1.54	2.43	145.45	4.54	1.87	44.99
61.8	0	46	1	1	1	1	1	0	1	0	0	0	0	1.8	1.21	2.61	141.7	6.44	2.47	51.4
37.3	0	48	1	1	1	1	2	1	1	0	0	0	0	1.9	1.35	3.47	280.3	4.58	1.32	50.5
59.7	0	44	1	1	1	1	1	1	1	0	0	0	0	1.3	1.74	2.75	111.54	5	1.82	45.04
42.6	0	48	1	1	1	1	1	1	1	0	0	0	0	1.9	1.67	1.98	84.49	4.86	2.45	42.42
24.4	1	43	1	1	1	1	1	0	1	0	0	0	0	1	1.37	6.16	158.87	8.69	1.41	49.39
8.6	1	44	1	1	1	2	1	1	1	0	0	0	0	1.6	1.67	10.71	94.68	10.07	0.94	45.23
78.7	0	41	1	1	1	1	2	1	1	1	1	0	0	2.2	1.16	1.94	134.92	1.22	0.63	40.95
46.9	0	40	1	1	1	1	2	1	1	0	0	0	0	1.6	1.6	2.29	102.96	4.65	2.03	43.81
30.3	0	38	1	1	1	1	1	1	1	0	0	0	0	1.5	1.38	1.88	69.74	5.1	2.71	38.2
23.2	1	37	1	1	1	1	3	1	1	1	1	1	0	1.3	1.75	2.96	131.62	4.03	1.36	41.5
49.1	0	50	2	1	1	1	1	0	1	0	0	0	0	2.3	1.58	2.2	76.08	4.6	2.09	53.52
87.8	0	48	1	1	1	2	1	1	1	0	0	0	0	0.7	1.66	2.17	83.84	4.29	1.98	42.46
62.1	0	49	1	1	1	2	1	1	1	0	0	0	0	1	1.76	3.18	101.54	4.14	1.3	39.78
61.1	0	49	1	1	1	1	1	1	1	0	0	0	0	2	1.58	4.04	170.67	3.03	0.75	46.83
62	0	49	1	1	1	1	1	0	1	0	0	0	0	1.2	1.4	2.46	117.76	3.74	1.52	45.31
3.4	0	46	1	1	1	1	2	0	1	0	0	0	0	1.2	1.29	0.66	206.9	0.77	1.16	40.19
50.6	0	49	2	1	1	2	1	0	1	1	1	0	0	1.6	1.61	2.44	113.53	3.25	1.33	45.92
26.2	1	45	2	1	1	1	2	1	1	0	0	0	0	0.8	1.31	2.65	127.94	5.4	2.04	38.86
54.7	0	48	1	1	1	1	1	0	1	0	0	0	0	1.9	1.48	2.85	215.75	4.16	1.46	47.93
77.3	0	44	1	1	1	2	2	0	1	1	1	0	0	1.97	1.68	0.94	85.37	1.54	1.64	43.19
46.1	1	44	1	1	1	1	3	1	1	0	0	0	0	1.8	1.24	2.94	204.6	5.11	1.74	49.42
28.8	1	42	2	1	1	2	3	1	1	0	0	1	0	1.2	2.64	2.46	152.63	5.15	2.09	38.56
49.6	0	46	2	1	1	1	1	1	1	0	0	0	0	1.6	1.29	1.36	127.01	1.86	1.37	48.66
27.7	0	45	1	1	1	1	2	1	1	1	1	0	0	1.2	1.14	1.25	270.15	1.67	1.34	36.5
83	1	40	1	1	1	1	2	1	1	1	1	1	0	1.8	1.99	3.97	171.79	4.64	1.17	51.5
24.8	0	44	1	1	1	1	1	0	1	1	1	0	0	1.6	1.33	2.12	64.67	3.18	1.5	39.67
36.8	0	42	2	1	1	1	1	1	1	0	0	0	0	1.8	1.35	1.8	151.7	2.65	1.47	39.48
49.9	0	38	1	1	1	2	1	1	1	0	0	0	0	1.4	2.07	2.79	74.57	4.83	1.73	49.48
49.8	0	37	1	1	1	1	2	1	1	1	1	0	0	1	1.37	5.18	250.79	6.53	1.26	50.78
9.7	0	38	2	1	1	1	3	1	1	1	1	0	0	2.5	1.81	7.33	909.52	1.54	0.21	43.76
38.8	0	41	1	2	1	2	2	0	1	0	0	0	0	3.9	1.57	1.76	75.16	2.83	1.61	43.28
58.4	0	38	2	2	1	1	1	1	1	0	1	1	0	2.2	1.52	1.32	101.11	2.38	1.8	47.75
86.7	0	36	1	1	1	1	2	1	1	0	0	0	0	0.8	2.29	1.87	143.26	2.63	1.41	46.66
37.6	0	40	1	1	1	1	1	1	1	0	0	0	0	1.1	1.39	7.64	198.75	6.11	0.8	44.1
37.6	0	39	1	1	1	1	1	1	1	0	0	0	0	1.4	1.24	3.61	206.63	5.99	1.66	46.7
37	0	37	1	1	1	1	1	0	1	0	0	0	0	1.9	1.13	3.22	322.81	5.51	1.71	36.6
36.7	0	36	1	1	1	1	1	1	1	0	0	0	0	1.4	1.63	1.95	106.67	4.38	2.25	45
22.2	0	37	2	2	1	3	3	1	1	1	1	1	0	1.8	1.43	2.45	231.58	3.72	1.52	42.59
26	0	36	1	1	1	1	1	1	1	0	0	0	0	2.2	1.25	2.29	94.65	6.85	2.99	37.69
3.2	0	46	2	1	1	2	1	0	1	0	0	0	0	1.7	1.26	7.56	215.12	6.5	0.86	47.5
25.2	0	43	1	1	1	1	1	0	1	0	0	0	0	1.8	1.4	1.49	102.7	2.76	1.85	38.69
18.5	0	42	1	1	1	1	1	0	1	1	1	0	0	1.4	1.37	1.06	122.48	2.74	2.58	43.6
49.4	0	35	1	1	1	1	1	0	1	0	0	0	0	1.7	1.55	1.95	94.25	3.39	1.74	51.13
53.8	1	45	1	1	1	1	1	1	1	0	0	0	0	1.2	1.8	1.13	109.66	2.69	2.38	44.66
25.4	0	42	2	1	1	1	3	1	1	1	1	0	0	2.8	0.94	4.8	227.13	6.19	1.29	34.3
59.3	0	50	1	1	1	1	1	0	1	0	0	0	0	1.6	1.57	2.94	65.31	4.32	1.47	44.18
64.2	0	45	1	1	1	1	1	1	1	1	1	0	0	1.1	1.66	4.34	93.51	6.68	1.54	47.57
61.8	0	41	1	1	1	1	1	1	1	0	0	0	0	1.1	1.59	2.83	111.94	3.79	1.34	40.88
24.8	0	33	1	1	1	1	3	0	1	1	1	0	0	1.7	1	13.25	489.47	12.59	0.95	37.71
41.5	0	43	1	1	1	1	1	0	1	1	1	0	0	1.7	1.26	2.27	127.14	4.52	1.99	39.86
95.2	0	43	2	1	1	1	1	1	1	0	0	0	0	0.6	1.65	1.48	60.14	4.3	2.91	49.5
61.9	0	37	2	1	1	1	1	1	1	0	0	0	0	0.8	1.46	2.92	95.8	4.17	1.43	44.26
20.8	0	35	2	1	1	1	1	0	1	1	1	0	0	1.6	1.46	2.55	120	4.33	1.7	41.27
25.1	0	41	1	1	1	1	1	0	1	0	0	0	0	1.6	0.89	1.63	55.17	2.36	1.45	43.38
32.3	1	44	1	1	1	1	3	1	1	1	1	0	0	2.1	1.28	1.28	61.31	2.54	1.99	38
12.8	0	49	1	1	1	1	3	0	1	1	1	1	0	2.1	1.86	8.58	232.97	7.81	0.91	30.69
9.8	1	31	1	1	1	1	3	0	1	0	0	1	0	2.3	1.17	3.62	256.94	5.21	1.44	36.4
22.8	0	49	2	1	1	2	2	0	1	1	1	0	0	1.7	1.54	3.2	159.89	5.66	1.77	38.17
33.1	0	39	1	1	1	1	1	1	1	0	0	0	0	1.5	1.48	4.15	162.2	5.27	1.27	45.6
78.4	0	49	1	1	1	1	2	0	1	0	0	0	0	1.81	1.34	2.28	194.04	3.44	1.51	45.7
35.3	0	37	1	1	1	1	2	1	1	1	1	0	0	1.4	1.41	2.73	120.3	5.38	1.97	42.8
120.8	0	43	1	1	1	1	1	0	1	1	1	0	0	2.5	1.46	2.03	149.59	2.5	1.23	40.28
61.1	0	35	2	1	1	1	1	1	1	0	0	0	0	1.3	2.03	2.38	175.86	2.76	1.16	48.51
25.4	1	45	1	1	1	1	1	1	1	0	0	0	0	1.7	1.31	1.17	101.24	2.82	2.42	40.44
26	0	40	1	1	1	1	1	1	1	1	1	0	0	1.5	2.11	2.98	151.63	4.56	1.53	45.04
36.9	0	38	1	1	1	2	1	1	1	0	0	0	0	2.2	1.33	3.05	188.61	2.41	0.79	43.3
25	0	38	1	2	1	1	1	1	1	1	1	0	0	1.7	1.38	2.07	136.08	4.01	1.94	40
29	0	49	1	1	1	2	3	0	1	1	1	0	0	4.4	1.12	2.72	167.42	2.42	0.89	35.73
11.9	0	49	1	1	1	1	3	1	1	1	1	1	0	2.8	1.65	2.98	175.63	5.87	1.97	37.59
11.3	1	45	1	1	1	1	2	0	1	0	0	1	0	1.8	1.41	1.58	203.65	2.17	1.37	40.9
49.4	0	41	2	1	1	1	1	1	1	0	0	0	0	1.2	1.2	2.46	93.41	4.11	1.67	45.74
37.3	0	40	1	1	1	1	1	1	1	0	0	0	0	1.3	1.43	4.28	275.23	4.67	1.09	46.6
61.1	0	36	1	1	1	3	1	1	1	0	1	1	0	0.8	1.62	1.27	117.99	2.4	1.89	40.56
86.2	0	39	1	1	1	1	1	0	1	0	0	0	0	0.8	1.6	1.94	63.27	3.81	1.96	46.41
12.6	0	44	1	1	1	1	1	1	1	1	1	0	0	4.5	1.06	2.34	131.43	4.1	1.75	37.08
48.9	0	40	1	1	1	1	1	0	1	0	0	0	0	1.5	1.74	2.68	137.8	4.4	1.64	48.98
76.7	0	34	1	1	1	1	2	1	1	1	1	0	0	3.93	1.04	5.29	266.15	3.44	0.65	42.51
25	0	36	1	1	1	1	3	0	1	1	1	0	0	3.3	1.3	5.69	211.85	7.68	1.35	42.04
25.4	0	39	1	1	1	1	1	0	1	1	1	0	0	2	1.28	1.92	66.47	3.21	1.67	37.98
69.7	0	30	1	1	1	1	1	0	1	0	0	0	0	1.3	1.85	3.13	90.34	4.54	1.45	47.92
12.6	0	38	1	1	1	1	1	1	1	1	1	0	0	3.3	1.17	1.83	97.83	1.68	0.92	42.7
33	0	36	1	1	1	1	1	0	1	0	0	0	0	1.9	1.15	2.56	129.14	3.86	1.51	44.64
49	0	50	1	1	1	1	1	1	1	0	0	0	0	3.4	1.8	4.77	84.55	5.87	1.23	44.66
25	0	44	1	1	1	2	3	1	1	0	0	0	0	1.3	1.55	2.01	112.02	3.68	1.83	41.3
84.5	0	39	1	1	1	1	1	1	1	0	0	0	0	0.6	1.56	4.17	53.01	6.93	1.66	50.76
48.9	0	42	1	1	1	1	1	1	1	0	0	0	0	1.6	1.12	0.95	74.6	3.55	3.74	46.41
23.8	0	44	1	1	1	1	2	0	1	1	1	0	0	1.6	1.38	1.72	115.48	5.79	3.36	41.9
60.2	0	36	2	1	1	3	1	1	1	0	0	0	0	0.98	1.7	1.51	77.98	2.53	1.68	46.09
57.6	0	35	1	1	1	1	1	1	1	0	0	0	0	1.4	1.95	2.36	124.12	4.02	1.7	41.76
33.4	0	46	1	1	1	1	1	1	1	0	1	0	0	2.6	1.1	1.84	154.69	2.35	1.28	35.4
4.3	1	29	1	1	1	1	3	1	1	0	0	0	0	1.7	1.37	4.08	103.13	5.22	1.28	44.38
24.6	0	36	1	1	1	1	1	0	1	0	0	0	0	2.1	1.69	2.76	105	4.42	1.6	44.5
22.1	0	35	2	1	1	1	1	1	1	1	1	0	0	1.9	1.94	2.19	70.25	3.46	1.58	44.54
11.6	1	34	1	1	1	1	3	1	1	0	0	0	0	1.9	1.24	3.21	155.12	4.08	1.27	40.36
53.6	0	24	1	1	1	1	1	1	1	0	0	0	0	1.96	1.27	1.65	54.15	3.77	2.29	41.84
57.7	0	31	2	1	1	1	1	0	1	0	0	0	0	1.5	1.74	9.3	187.91	8.46	0.91	53.28
20.8	0	28	1	2	1	1	1	0	1	1	1	0	0	2.3	1.83	1.38	109.05	2.89	2.1	43.54
71.6	0	50	2	1	1	1	2	1	1	0	0	0	0	1.5	1.72	1.8	147.69	3.51	1.95	48.16
23.8	0	45	2	1	1	1	2	0	1	0	0	0	0	3.1	1.12	0.53	115.43	0.93	1.75	41.7
50.7	0	44	1	1	1	1	2	0	1	0	0	0	0	5.1	0.85	5.84	187.84	4.32	0.74	38
48.8	0	44	2	1	1	2	2	0	1	0	0	0	0	1.7	1.59	1.19	106.58	2.72	2.28	38.39
38.9	0	42	2	1	1	1	1	1	1	0	0	0	0	1.1	1.49	6.57	208.02	10.64	1.62	49.82
61	0	50	1	1	1	1	2	0	1	0	0	0	0	1.25	1.51	2.74	164.78	4.35	1.59	47.2
43.1	0	46	1	1	1	1	1	1	1	0	0	0	0	1	1.32	2.14	136.8	2.68	1.25	37.58
61.3	0	47	2	1	1	1	1	0	1	0	0	0	0	1.44	1.57	2.47	143.04	3.9	1.58	45.11
37.3	0	48	1	1	1	1	1	0	1	0	0	0	0	1.6	1.33	1.73	144.39	3.55	2.05	48.7
27.4	0	48	1	1	1	1	3	1	1	1	1	0	0	1.7	1.42	2.87	178.09	5.11	1.78	39.95
38.6	0	46	1	1	1	2	3	1	1	1	1	0	0	2.6	1.06	3.25	312	4.06	1.25	46.4
65.3	0	42	2	1	1	1	2	0	1	0	0	0	0	2.07	1.35	2.26	102.97	2.28	1.01	38.68
53	0	44	1	1	1	2	1	0	1	0	0	0	0	1.3	1.33	1.79	161.02	3.17	1.77	48.09
5.2	1	43	1	1	1	1	3	1	1	0	0	0	0	1.3	2.16	6.83	437.5	4.37	0.64	42.8
12	0	45	1	1	1	1	1	1	1	1	1	0	0	1.9	1.46	3.46	215.53	3.56	1.03	35.9
51.2	0	42	1	1	1	1	3	1	1	0	0	0	0	1.7	1.01	5.29	285.71	6.29	1.19	33.33
24.9	0	44	1	1	1	1	3	1	1	1	1	0	0	1.6	1.28	2.19	110.53	5	2.28	36.49
14	1	42	1	1	1	1	3	1	1	0	0	0	0	1.3	1.54	2.46	272.36	3.03	1.23	40.63
63.4	0	50	1	1	1	1	1	1	1	1	1	0	0	0.5	1.64	1.89	132.46	3.61	1.91	43.94
60.1	0	48	2	1	1	1	2	0	1	0	0	0	0	2.27	1.23	2.35	148.62	2.56	1.09	38.23
35.1	0	50	1	1	1	1	3	1	1	0	0	0	0	1.2	1.33	3.77	107.01	8.07	2.14	42.7
27.4	0	48	1	1	1	1	3	0	1	0	0	0	0	2.2	1.28	1.58	182.29	2.76	1.75	38.8
61.3	0	44	1	1	1	1	1	1	1	0	0	0	0	1.82	1.36	2.49	173.83	2.66	1.07	50.69
24.7	0	47	1	1	1	1	3	0	1	1	1	0	0	2.8	1.06	1.93	179.52	4.06	2.1	39.22
46.2	0	45	1	1	1	1	1	0	1	0	0	0	0	1.4	1.57	6.46	176.06	4.59	0.71	39.44
23.2	0	46	1	1	1	2	1	0	1	1	1	0	0	1.9	1.51	3.25	149.69	5.17	1.59	35.5
61.4	0	41	1	1	1	1	1	0	1	0	0	0	0	1.8	1.79	2.16	152.08	3.11	1.44	49.31
19.1	1	39	1	1	1	1	3	0	1	0	0	1	0	1.2	0.9	2.03	184.26	2.19	1.08	37.75
72.2	0	40	1	2	1	3	1	0	1	0	0	0	0	1.4	1.71	3.34	150.66	5.07	1.52	53.55
64.2	0	40	1	1	1	1	1	1	1	0	0	0	0	1.7	1.35	4.89	315.89	5.23	1.07	47.33
62	0	49	1	1	1	1	3	1	1	0	0	0	0	1.6	1.32	2.66	337.4	3.49	1.31	47.24
60.3	0	48	1	2	1	1	1	1	1	0	0	0	0	1.82	1.59	1.7	139.5	2.02	1.19	51.72
86.3	0	48	1	1	1	1	2	1	1	0	0	0	0	1.5	1.48	5.86	163.16	4.45	0.76	41.25
63	0	49	1	1	1	1	2	1	1	0	0	0	0	1.3	1.95	5.09	195.24	6.41	1.26	50.22
28.9	1	49	1	1	1	3	1	1	1	1	1	0	0	1.6	1.66	2.05	101.52	5.39	2.63	47.94
38.8	0	48	1	1	1	1	1	0	1	0	0	0	0	1.5	1.31	2.31	78.03	3.99	1.73	39.3
19.6	0	42	1	1	1	2	1	0	1	0	0	0	0	1	1.51	2.24	115.28	5.13	2.29	44.92
38	0	46	1	1	1	1	3	1	1	1	1	0	0	1.5	1.6	3.76	328.95	4.29	1.14	51.8
49.1	0	41	1	1	1	1	1	0	1	0	0	0	0	1.5	1.42	2.89	158.7	5.32	1.84	45.99
48.1	0	42	1	1	1	1	1	0	1	0	0	0	0	1.6	2.14	2.61	187.8	2.14	0.82	45.71
3.6	1	39	1	1	1	1	2	1	1	0	0	0	0	1.5	1.44	2.56	180.37	4.17	1.63	41.76
62.7	0	50	1	2	1	1	1	1	1	0	0	0	0	2.1	0.92	1.04	84.72	2.24	2.16	38.56
66.7	0	49	1	1	1	2	3	0	1	1	1	1	0	1.3	1.59	2.5	131.58	3.32	1.33	48.18
52.2	0	49	1	1	1	2	1	1	1	1	1	0	0	1.7	1.63	2.71	160.2	5.45	2.01	45.59
50.4	0	48	1	1	1	1	2	1	1	0	0	0	0	2.3	1.49	3.16	159.26	7.67	2.43	46.57
19	0	49	2	2	1	1	3	0	1	1	1	0	0	3.9	1.31	14.95	240.16	18.99	1.27	37.14
16.4	1	49	1	1	1	2	3	0	1	1	1	0	0	2.3	1.3	4.74	252.68	5.31	1.12	45.06
39.5	0	48	1	1	1	1	1	0	1	1	1	0	0	2.1	1.21	1.68	236.3	2.46	1.46	46.07
71.3	0	44	1	1	1	1	1	1	1	1	1	0	0	1.28	1.89	4.4	141.94	5.46	1.24	47.2
4.1	1	45	2	1	1	1	1	1	1	0	0	0	0	1.7	1.08	2.81	292.04	3.17	1.13	40.4
48.9	0	40	1	2	1	1	1	1	1	0	0	0	0	1.5	1.19	2.12	91.54	2.76	1.3	47.65
85	0	38	1	1	1	1	1	1	1	0	0	0	0	0.9	1.72	2.62	227.93	4.69	1.79	46.47
51.2	0	47	1	1	1	1	3	1	1	0	0	0	0	1.8	1.8	2.74	130.54	5.57	2.03	49.8
29.1	0	47	1	1	1	1	3	1	1	1	1	0	0	1.9	1.51	1.4	105.42	3.35	2.4	40.8
27.1	1	42	1	1	1	1	2	1	1	0	0	0	0	1.6	1.58	6.66	223.6	5.93	0.89	49.93
85.6	0	47	1	1	1	1	1	1	1	0	0	0	0	1	1.94	3.71	147.86	5.2	1.4	49.51
71.4	0	47	1	1	1	1	3	1	1	0	0	0	0	1.83	1.42	2.26	112.36	4.02	1.78	39.9
36.9	0	47	2	1	1	1	2	1	1	0	0	0	0	1.9	1.41	3.22	138.46	5.45	1.69	43.2
37.3	0	46	2	1	1	1	2	1	1	0	0	0	0	2.1	1.24	5.82	204.85	5.99	1.03	48.1
26.1	0	46	2	1	1	1	2	1	1	1	1	0	0	1.5	1.45	2.93	148.6	3.13	1.07	46.67
36.8	0	44	2	1	1	2	1	0	1	0	0	0	0	1.9	1.97	1.68	106.8	3.47	2.06	51.13
0.8	1	42	1	1	1	1	2	0	1	0	0	0	0	2	2.04	14.13	428.3	7.49	0.53	34.12
5.2	0	50	2	1	1	1	1	0	1	0	0	0	0	2	1.17	2.89	263.74	2.63	0.91	46.65
11.4	1	50	1	1	1	1	1	1	1	0	0	0	0	1.6	1.34	2.8	72.99	4.87	1.74	47.2
54.9	0	46	1	1	1	1	1	1	1	0	0	0	0	1.1	1.46	2.36	94.92	2.78	1.18	46.68
49.7	0	46	1	1	1	1	1	0	1	0	0	0	0	5.6	1.19	3.1	163.69	4.86	1.57	43.11
136.7	0	43	1	1	1	1	3	1	1	0	0	0	0	0.5	1.87	3.53	126.73	3.57	1.01	44.77
12.2	1	47	1	1	1	1	1	1	1	0	0	0	0	2	1.6	2.92	102.81	7.28	2.49	35.4
25.2	0	47	1	1	1	1	1	1	1	1	1	0	0	3	0.97	1.03	79.94	3.43	3.34	33.16
25.1	0	47	1	1	1	1	3	1	1	1	1	0	0	1.8	1.4	1.82	211.59	2.51	1.38	42.15
8.7	1	45	2	1	1	3	3	1	1	1	1	0	0	2.3	1.03	2.96	209.63	3.99	1.35	42.42
85.7	0	47	1	1	1	1	1	0	1	0	0	0	0	1.6	1.62	5.6	242.71	5.38	0.96	50.46
61.2	0	46	1	1	1	1	1	1	1	0	0	0	0	1	2.07	6.12	309.17	7.34	1.2	46.78
61.6	0	46	1	1	1	1	2	1	1	0	0	0	0	1.3	1.83	1.38	151.52	2.27	1.65	46.67
25	0	48	2	1	1	1	1	0	1	1	1	0	0	2.2	1.49	3	190.52	3.48	1.16	46.98
26.9	0	48	2	2	1	1	3	0	1	1	1	0	0	1.8	1.59	2.21	120.41	3.25	1.47	39.18
77.5	0	43	1	1	1	1	3	1	1	1	1	0	0	3.7	1.02	2.14	139.67	5.19	2.42	37.94
37.8	0	47	1	1	1	1	1	1	1	0	0	0	0	1.4	1.54	3.18	121.26	5.53	1.74	44.78
62	0	42	1	1	1	1	1	1	1	1	1	0	0	0.4	1.57	2.84	145.8	6.77	2.38	45.74
24.4	0	43	1	1	1	1	1	1	1	1	1	0	0	1.8	1.46	3.37	264.41	3.98	1.18	40.91
63.6	0	50	1	1	1	1	2	1	1	0	0	0	0	1.7	1.51	2.94	205.06	4.64	1.58	45.88
61.8	0	49	1	1	1	1	2	1	1	1	1	0	0	1.56	1.29	1.73	117.9	2.8	1.62	45.09
99.1	0	47	2	1	1	1	1	1	1	0	0	0	0	1	1.58	1.83	212.87	1.85	1.01	41.89
6.6	1	46	1	1	1	2	3	0	1	0	0	0	0	1.3	1.37	1.12	83.08	2.26	2.01	45.04
18	0	50	1	1	1	1	1	0	1	0	0	0	0	5	0.54	3.03	225	1.82	0.6	34.1
28.9	0	49	2	1	1	1	2	1	1	1	1	0	0	2	1.5	4.1	275.82	3.73	0.91	51.17
33.3	1	47	1	1	1	3	2	1	1	0	0	0	0	1.8	1.35	1.43	112.1	2.25	1.57	42.36
58.7	0	45	1	1	1	1	1	1	1	0	0	0	0	1.09	1.46	1.89	108.82	3.22	1.7	42.97
92.2	0	43	1	1	1	1	1	0	1	0	0	0	0	1.7	1.15	4.28	190.91	6.12	1.43	47.12
23.1	0	49	1	1	1	1	1	1	1	1	1	0	0	1.7	1.76	1.86	162.69	2.49	1.34	50.16
36.7	0	46	2	1	1	1	1	0	1	0	0	0	0	1.9	1.36	6.72	261.76	4.57	0.68	45.2
61.8	0	42	1	1	1	1	1	0	1	0	0	0	0	1.28	1.38	1.97	125.13	3.77	1.91	42.84
3.9	1	45	1	1	1	2	3	0	1	0	0	0	0	3.3	1.05	2.43	165.32	3.01	1.24	36.62
14	0	45	1	1	1	1	2	1	1	1	1	0	0	2.1	1.42	0.97	137.88	1.93	1.98	44.5
49.2	0	41	1	1	1	1	1	1	1	0	0	0	0	1.5	1.96	3.74	176.99	4.23	1.13	48.45
12.2	0	44	2	1	1	1	1	0	1	0	0	0	0	1.8	1.42	1.65	108.66	2.1	1.27	40.9
85.9	0	37	1	1	1	1	1	1	1	0	0	0	0	0.9	1.77	2.64	164.57	3.35	1.27	40.14
44.6	0	38	1	2	1	1	1	0	1	0	0	0	0	1.6	1.17	1.76	69.42	4.27	2.42	47.5
43.6	0	36	1	1	1	1	2	1	1	1	1	0	0	1.6	1.46	1.6	74.19	3.48	2.17	47.3
32	0	37	1	1	1	1	1	0	1	0	0	0	0	1.7	1.72	4.84	302.46	5.9	1.22	51.45
63.2	0	48	1	1	1	1	1	1	1	0	0	0	0	0.9	1.55	3.01	210	2.71	0.9	52.11
60.7	0	49	1	1	1	1	1	0	1	0	0	0	0	1.81	1.54	1.77	88.02	3.85	2.17	48.95
49.7	0	50	2	1	1	1	2	0	1	0	0	0	0	1.5	1.42	1.57	123.76	1.59	1.01	41.25
61.4	0	48	1	1	1	1	1	0	1	0	0	0	0	2	1.54	1.88	163.69	3.36	1.79	45.56
38.2	0	50	1	1	1	2	2	0	1	0	0	0	0	2.5	1.26	1.79	115.88	3.04	1.7	47.59
67.4	0	47	2	1	1	1	1	0	1	0	0	0	0	1.5	1.29	2	108.68	4.38	2.19	41.08
23.8	0	50	1	1	1	1	3	1	1	1	1	0	0	2.2	1.58	3.98	413.58	3.22	0.81	44.67
77.5	0	46	1	1	1	2	3	0	1	0	0	0	0	2.4	1.19	2.63	151.9	4.15	1.58	48.55
37.9	1	46	2	1	1	1	1	0	1	0	0	0	0	1.5	2.06	2.12	184.96	2.39	1.13	47.13
23.5	0	49	1	1	1	1	3	1	1	1	1	0	0	2	1.39	3.87	222.88	4.57	1.18	51.51
25	0	48	1	1	1	2	1	0	1	0	0	0	0	1.5	1.39	2.33	115.63	4.48	1.92	38.4
39.3	0	47	2	1	1	1	1	0	1	0	0	0	0	1.2	1.11	4.32	147.17	4.58	1.06	44.7
15.3	0	49	1	1	1	1	1	1	1	1	1	0	0	2.2	1.18	2.3	148.74	5.47	2.38	42.9
44.3	0	46	2	1	1	1	1	0	1	0	0	0	0	1.4	1.55	6.93	212.3	8.45	1.22	37.12
39.3	0	43	1	1	1	1	3	1	1	1	1	0	0	1.4	1.52	2.73	113.48	4.86	1.78	38.8
85.4	0	38	1	1	1	1	1	0	1	0	0	0	0	0.6	2.3	2.19	147.2	2.74	1.25	48.45
63	0	50	1	1	1	1	1	1	1	0	0	0	0	2.1	1.19	3.12	158.55	6.02	1.93	44.76
37.8	0	50	1	1	1	1	1	0	1	0	0	0	0	1.4	1.3	4.65	289.89	4.14	0.89	44.33
62.6	0	47	2	1	1	1	3	1	1	0	0	0	0	4.5	1.47	1.94	107.04	3.87	1.99	45.93
59.9	0	44	1	1	1	1	1	0	1	0	0	0	0	2.32	1.51	1.12	91.3	1.8	1.61	38.51
41.2	1	42	1	1	1	2	1	1	1	0	0	0	0	0.9	1.75	2.56	109.75	6.05	2.36	49.22
12.9	1	41	1	1	1	1	2	0	1	0	0	0	0	9.6	0.98	11.81	377.19	6.73	0.57	40.1
27.8	0	44	2	1	1	1	1	1	1	1	1	0	0	2.7	1	2.28	82.67	4.61	2.02	49.29
37	1	40	2	1	1	1	2	1	1	0	0	0	0	0.9	1.5	20.4	993.33	3.06	0.15	45.65
49.2	0	38	1	1	1	2	1	0	1	0	0	0	0	1.8	1.35	4.61	251	4.61	1	50.46
48.9	0	37	1	1	1	1	1	1	1	0	0	0	0	1.8	1.66	1.48	169.48	2.28	1.54	48.29
2	0	48	1	1	1	1	1	0	1	0	0	0	0	1.1	1.35	8.42	260.4	8.5	1.01	42.54
73	0	49	1	1	1	1	1	0	1	0	0	0	0	1.92	1.68	1.34	103.26	2.46	1.84	42.43
49.9	0	47	2	1	1	2	1	1	1	0	0	0	0	1.3	1.37	1.5	122.52	3.32	2.22	46.93
24.9	0	48	2	1	1	1	1	1	1	0	0	0	0	2.3	1.64	2.22	122.82	4.57	2.06	46
39.4	0	47	1	1	1	1	3	1	1	1	1	0	0	1.6	1.69	1.12	87.56	2.26	2.01	41.96
47.8	0	45	1	1	1	1	1	1	1	0	0	0	0	1.4	1.32	2.13	121.88	3.41	1.6	49.39
64.3	0	44	2	1	1	1	2	1	1	1	1	0	0	1.2	1.7	3.28	164.76	3.44	1.05	52.6
24.1	0	47	1	1	1	1	3	1	1	1	1	0	1	1.6	1.26	7.09	273.53	7.23	1.02	38.68
21.7	0	46	1	1	1	1	3	1	1	1	1	0	0	2.3	1.22	4.05	222.38	5.79	1.43	40.74
14.8	1	43	1	1	1	1	3	0	1	0	0	0	0	1.3	1.59	3.8	283.54	3	0.79	47.4
49.3	0	44	1	1	1	1	1	0	1	0	0	0	0	3.3	1.73	3.11	225.66	4.73	1.52	45.2
69.3	0	42	1	1	1	1	1	0	1	1	1	0	0	1.75	1.42	1.88	132.97	3.47	1.85	43.51
24.5	0	42	1	2	1	3	1	1	1	1	1	0	0	1.8	2.04	0.94	115.52	1.64	1.74	44
25.2	0	42	1	1	1	1	3	0	1	1	1	0	0	2.1	1.86	2.49	247.52	3.51	1.41	39.2
58.2	0	35	1	1	1	1	1	0	1	0	0	0	0	1.2	1.58	3.55	103.29	7.56	2.13	48.45
19	0	50	1	1	1	1	1	0	1	0	0	0	0	1	1.49	2.39	123.5	4.37	1.83	49.85
58.3	0	49	1	1	1	2	2	1	1	0	0	0	0	1.7	1.28	5.35	181.31	5.72	1.07	44.19
24.5	0	47	1	1	1	1	1	0	1	1	1	0	0	1.5	1.16	3.87	101.52	5.11	1.32	46.43
86.1	0	40	1	1	1	1	1	1	1	0	0	0	0	1	1.89	2.55	106.29	4.06	1.59	48.73
24.9	0	42	2	2	1	1	2	0	1	1	1	0	0	1.8	1.48	3.84	151.72	4.45	1.16	44.1
76.8	0	45	1	1	1	1	1	1	1	0	0	0	0	2.5	1.88	1.16	179.31	1.35	1.16	43.35
22.4	0	42	1	1	1	1	3	1	1	1	1	0	0	1.6	1.59	2.38	103.8	4.38	1.84	44.28
37.9	0	37	2	1	1	1	1	1	1	0	0	0	0	2.4	1.65	2.84	94.35	3.52	1.24	47.6
16.3	1	47	1	1	1	1	1	1	1	1	1	0	0	2.6	1.41	2.42	116.34	3.71	1.53	36.08
78.1	0	41	2	1	1	1	1	1	1	0	0	0	0	1.2	1.25	1.45	92.67	2.76	1.91	43.15
25.7	0	46	1	1	1	1	3	1	1	0	0	0	0	1.7	1.32	3.84	235	5.38	1.4	33.7
70.3	0	40	1	1	1	1	2	1	1	0	0	0	0	1.4	1.31	1.67	152.17	2.69	1.61	39.83
48.1	1	36	2	1	1	1	2	1	1	0	0	0	0	1.8	2.28	3.87	255.29	3.29	0.85	42.62
85.1	0	42	2	1	1	1	1	0	1	0	0	0	0	0.6	2.04	4.73	91.43	4.97	1.05	51.16
38.1	0	50	1	1	1	1	2	1	1	0	0	0	0	2.3	1.58	3.03	187.76	4.46	1.47	39.63
28.8	0	50	1	2	1	1	3	1	1	1	1	1	0	2	1.3	2.45	129.86	3.53	1.44	41.35
49.7	0	47	2	1	1	1	1	0	1	0	0	0	0	1.4	2.07	3.01	179.34	3.64	1.21	48.2
22.6	1	48	2	1	1	3	1	0	1	1	1	1	0	1.9	1.3	2.76	229.81	2.87	1.04	37.18
47.3	0	40	2	1	1	1	2	1	1	0	0	0	0	1.7	1.37	1.06	70.73	2.61	2.46	45
14.4	1	50	1	1	1	1	1	0	1	0	0	0	0	2.8	1.14	2.03	144.78	2.72	1.34	37.35
37	0	41	1	1	1	1	1	0	1	0	0	0	0	1.3	1.56	2.52	137.6	3.15	1.25	46.2
51.2	0	47	1	1	1	1	2	1	1	0	0	0	0	1.4	1.45	12.99	220.27	9.61	0.74	40.3
61.1	0	42	2	1	1	1	1	1	1	0	0	0	0	1.2	1.7	2.67	109.3	4.6	1.72	47.4
48	0	43	2	1	1	1	2	1	1	0	0	0	0	1.7	1.65	4.22	133.09	5.86	1.39	49.84
44.5	0	48	1	1	1	1	3	1	1	0	0	0	0	1.4	1.41	3.09	183.52	5.62	1.82	43.75
25.4	0	46	1	1	1	1	1	1	1	0	0	0	0	1.8	1.16	2.1	141.86	3.62	1.72	34.2
62.4	0	27	1	1	1	2	2	1	1	0	0	0	0	1.2	1.47	1.72	110.34	2	1.16	43.12
51.3	0	44	1	1	1	1	1	1	1	0	0	0	0	1.9	1.39	3.84	137.67	5.61	1.46	46.83
61.9	0	32	1	1	1	1	1	1	1	0	0	0	0	2.5	1.36	2.57	116.33	5.03	1.96	55.9
61.8	0	45	1	1	1	2	1	1	1	0	0	0	0	1.2	1.6	3.67	92.99	5.76	1.57	48.55
25.6	0	44	1	1	1	1	1	1	1	1	1	0	0	2.5	1.15	6.5	157.35	8.84	1.36	42.7
79.7	0	37	1	1	1	3	1	1	1	0	0	0	0	0.5	2.04	3.14	131.11	4.24	1.35	51.67
24	0	45	1	1	1	1	1	1	1	0	0	0	0	1.8	1.96	3.12	181.91	2.93	0.94	41.17
52.7	0	38	1	1	1	1	2	1	1	1	1	1	0	1.6	1.56	9.23	561.7	4.34	0.47	48.26
24.8	0	50	1	1	1	1	1	1	1	1	1	0	0	2	1.42	1.12	220.51	1.31	1.17	39.8
35.3	0	45	1	1	1	1	2	1	1	1	1	0	0	1.8	1.24	2.98	127.17	5.16	1.73	43.2
12.6	0	45	1	1	1	3	1	1	1	1	1	0	0	2.5	1.75	3.21	93.26	6.2	1.93	46.85
25.4	0	37	1	1	1	2	3	0	1	1	1	0	0	1.6	1.26	2.1	240.48	2.65	1.26	39.96
9.3	1	31	1	1	1	1	1	0	1	1	1	0	0	1.7	1.52	3.44	123.67	5.81	1.69	36.5
37.6	0	46	1	1	1	1	1	1	1	0	0	0	0	1.5	1.78	3.39	207.58	4.47	1.32	49.51
37.9	0	47	1	1	1	2	1	1	1	0	0	0	0	1.4	1.95	1.68	149.45	3.06	1.82	38.4
60.1	0	43	1	1	1	1	1	1	1	0	0	0	0	1.7	1.57	2.37	110.28	5.07	2.14	49.44
51.7	0	41	1	1	1	1	1	1	1	0	0	0	0	1.6	1.41	2.2	187.74	3.41	1.55	45.05
11.7	0	43	1	1	1	1	1	1	1	1	1	0	0	2.3	1.29	2.2	127.38	3.7	1.68	36.01
32.7	0	37	2	1	1	1	3	0	1	1	1	0	0	2.1	1.35	1.34	159.32	2.38	1.77	41.83
49.6	0	33	1	1	1	1	1	1	1	0	0	0	0	1.2	1.26	1.95	87.57	3.46	1.77	43.71
39.5	0	50	2	1	1	1	1	1	1	0	0	0	0	1.4	1.24	1.52	108.2	2.79	1.83	46.3
20.5	1	50	1	1	1	2	3	0	1	1	1	1	0	1.6	1.38	6.28	202.83	6.66	1.06	38.01
63.2	0	46	2	1	1	1	3	0	1	0	0	0	0	3.3	1.39	6.43	229.63	5.21	0.81	48.49
9	0	44	1	1	1	1	3	1	1	0	0	0	0	1.6	1.3	2.57	241.84	5.03	1.96	38.69
13	0	44	1	1	1	1	1	1	1	1	1	0	0	1.4	1.18	3.35	179.71	4.62	1.38	42
51.1	0	44	1	1	1	1	2	1	1	0	0	0	0	1.4	2.24	1.58	158.33	2.28	1.44	50.42
46	0	37	1	1	1	1	1	0	1	1	1	0	0	1.7	1.73	2.24	154.73	3.32	1.48	48.46
12.8	1	50	1	1	1	1	3	1	1	1	1	1	0	2.6	0.81	7.47	305.98	8.74	1.17	39.07
62.3	0	45	1	1	1	1	1	0	1	0	0	0	0	1	1.88	3.05	193.64	3.36	1.1	46.72
6.4	1	43	1	2	2	1	2	0	1	0	0	0	0	1.8	1.56	2.13	117.54	3.65	1.71	43.28
43.2	0	36	1	1	1	1	1	1	1	0	0	0	0	1.9	1.08	2.16	110.74	5.22	2.42	41.42
36	0	36	1	1	2	1	1	0	1	0	0	0	0	2.2	1.65	1.77	153.22	3.02	1.71	45.8
61.4	0	50	1	1	1	1	1	0	1	0	0	0	0	1.5	1.81	3.96	183.73	6.57	1.66	49.64
36.8	0	45	1	1	1	1	1	0	1	0	0	0	0	2.3	1.34	1.8	156.52	2.89	1.61	42.8
79.8	0	38	1	1	2	2	1	0	1	0	0	0	0	2.8	1.02	1.37	85.03	2.01	1.47	37.43
53.5	0	39	1	1	2	1	2	0	1	0	0	0	0	1.3	1.18	3.81	209.35	5.29	1.39	43.38
22.4	0	37	2	1	1	1	2	1	1	1	1	0	0	1.7	1.65	3.24	188.66	3.14	0.97	39.33
13	0	48	1	1	2	3	1	0	1	0	0	0	0	1	1.35	3.31	169.72	4.7	1.42	44.14
5.3	1	44	1	1	2	1	3	0	1	0	0	0	0	5.7	0.97	14.06	828.85	7.31	0.52	40.32
23.1	0	49	1	1	1	1	3	1	1	1	1	0	1	2	1.68	3.59	176.54	5.81	1.62	39.4
37.4	0	44	1	2	1	2	1	1	1	0	0	0	0	1.9	1.5	3.33	161.72	6.96	2.09	47.67
35.3	0	44	1	1	1	1	3	1	1	0	0	0	0	2.9	1.33	1.81	123.94	2.57	1.42	39.9
38.6	0	38	1	1	1	1	1	1	1	0	0	0	0	1.9	1.98	12.98	293.48	5.97	0.46	50
31.9	0	38	2	1	1	1	1	0	1	0	0	0	0	1.9	1.21	2.46	136.36	2.71	1.1	42.75
96.5	0	49	2	1	1	1	2	1	1	0	0	0	0	1.2	1.63	2.02	143.65	2.55	1.26	50.34
60.6	0	48	1	1	1	1	2	0	1	0	0	0	0	1.4	1.49	1.5	76.54	2.43	1.62	40.07
31.4	0	45	1	1	1	1	1	0	1	0	0	0	0	1	1.63	1.81	75.66	3.42	1.89	43.11
49.4	0	48	1	1	2	1	1	1	1	0	0	0	0	1.7	1.86	2.55	178.48	4.03	1.58	48.86
84.2	0	41	1	1	1	1	1	0	1	0	0	0	0	1	1.31	1.96	153.54	2.49	1.27	46.52
35.6	0	46	1	1	1	1	2	1	1	0	0	0	0	1.9	1.06	4.54	237.7	5.54	1.22	40.2
24.8	0	46	1	1	1	1	2	1	1	1	1	0	0	2.2	1.05	2.42	208.65	2.52	1.04	34.27
18.1	1	44	1	1	1	1	1	1	1	0	0	0	0	2	1.37	1.89	160.58	1.97	1.04	32.8
9.2	1	45	1	1	1	1	3	1	1	1	1	0	0	2.6	1.26	3.1	250.57	5.45	1.76	46.05
38.7	0	44	1	1	2	2	1	1	1	0	0	0	0	2.6	1.63	0.65	305	0.52	0.8	45.37
23.5	0	45	1	1	1	1	1	0	1	1	1	0	0	1.7	1.29	1.83	140.57	3.89	2.12	45.74
37.8	0	43	1	1	1	1	3	1	1	0	0	0	0	2.3	1.34	1.66	110.79	2.31	1.39	43.8
24.5	0	41	1	1	1	1	1	1	1	1	1	0	0	2.1	1.36	1.3	106.21	1.89	1.45	39.4
23.8	0	39	1	1	1	1	1	0	1	0	0	0	0	2.5	1.46	0.97	86.78	2.2	2.27	35.8
50.1	0	35	2	1	1	1	2	1	1	0	0	0	0	1.5	1.61	5.07	229.37	7.25	1.43	45.6
24.1	0	45	2	1	1	1	3	0	1	1	1	1	1	1.9	1.97	1.32	124.79	3.08	2.34	41.78
24.3	0	41	1	1	1	1	2	0	1	1	1	0	0	1.8	1.31	2.94	309.64	2.44	0.83	41.9
47.9	0	35	1	1	1	1	1	1	1	0	0	0	0	1.3	1.42	5.04	168.79	7.92	1.57	49.19
26.5	0	36	1	1	1	1	3	0	1	1	1	0	0	1.3	1.23	4.69	288.46	3.66	0.78	43.76
25	0	36	1	1	1	1	3	1	1	1	1	1	0	2.4	1.27	4.51	256.2	5.46	1.21	41.84
32.1	0	35	1	1	1	1	1	0	1	1	1	0	0	1.8	1.35	1.98	129.71	3.47	1.75	41.73
25.3	0	37	1	1	1	1	1	0	1	0	0	0	0	1.7	1.1	1.83	115.49	2.6	1.42	37.63
14.7	0	43	2	1	1	2	3	1	1	0	0	0	0	2.6	1.03	2.08	88.14	3.68	1.77	39.3
27.1	0	45	1	1	1	1	1	1	1	1	1	0	0	2	1.54	3.35	229.81	5.4	1.61	47
21.1	1	32	1	1	1	1	1	1	1	0	0	0	0	2	1.85	1.87	196.18	2.45	1.31	49.23
48.9	0	30	2	1	1	1	2	1	1	0	0	0	0	2.5	1.32	1.16	95	1.85	1.6	44.98
58.1	0	44	1	1	1	1	1	1	1	0	0	0	0	1.6	1.66	2.43	110.37	3.28	1.35	41.34
21	0	49	1	1	1	1	2	1	1	1	1	0	0	1.6	1.35	2.07	146.63	3.38	1.63	39.4
24.6	0	49	1	1	1	1	2	1	1	1	1	0	0	2.3	1.57	2.71	108.63	3.76	1.39	43.97
13.3	0	46	1	1	1	1	1	1	1	1	1	0	0	3.4	1.48	1.7	180.34	3.03	1.78	40.85
44.1	0	42	2	1	1	2	1	0	1	1	1	0	0	2.3	1.51	4.19	242.47	3.06	0.73	41.41
25.3	0	38	1	1	1	1	1	0	1	0	0	0	0	1.7	1.42	2.54	129.44	5	1.97	42.4
61.2	0	45	2	1	1	1	1	0	1	0	0	0	0	1.3	2.11	4.4	219.35	4.09	0.93	49.45
59.9	0	45	1	1	1	1	1	0	1	0	0	0	0	1.27	2.06	3.29	88.11	6.09	1.85	46.72
73.5	0	41	2	1	1	1	1	1	1	0	0	0	0	1.38	1.79	1.69	161.32	1.79	1.06	42.47
37.3	0	41	1	1	1	1	1	1	1	0	0	0	0	1.9	1.55	4.27	190.24	7.01	1.64	52.78
4.3	1	32	1	1	1	2	3	0	1	0	0	0	0	3.6	1.17	1.54	240.15	2.11	1.37	42.04
48.4	0	49	2	1	1	2	1	1	1	0	0	0	0	2.2	1.66	2.29	80.98	3.73	1.63	50.34
42.7	0	45	1	1	2	1	3	0	1	1	1	1	0	1.6	0.98	4.33	216.3	5.85	1.35	34.7
26.1	0	49	1	1	2	1	1	1	1	0	1	0	0	2.1	1.55	2.8	178.91	4.12	1.47	37.32
24.5	0	35	1	1	1	1	1	1	1	1	1	0	0	2.4	1.6	1.58	191.13	1.96	1.24	40
27	0	49	1	1	1	1	3	1	1	1	1	1	0	3.2	0.88	4.63	132.69	7.22	1.56	39.79
27	1	40	1	1	1	1	1	0	1	0	0	1	0	0.6	1.63	2.11	139.01	2.98	1.41	40.8
15.4	1	27	1	1	2	1	2	0	1	0	0	0	0	1.1	1.55	5.52	187.5	5.3	0.96	50.42
43.6	1	45	2	1	1	1	1	0	1	1	1	1	0	1.1	1.67	1.39	105.24	2.66	1.91	44.78
14.3	0	42	1	1	1	1	3	1	1	1	1	1	0	2.7	1.28	2.98	187.5	5	1.68	38.92
7.3	0	39	2	1	1	3	1	1	1	0	0	0	0	2.2	1.35	1.92	178.23	2.38	1.24	49.44
39	0	45	1	1	1	2	2	1	1	1	1	1	0	1.6	1.76	2.06	187.2	2.57	1.25	47.7
35.6	0	35	1	1	1	1	3	0	1	0	0	0	0	2	1.41	3.36	111.56	4.94	1.47	40.38
25	0	46	1	2	1	1	1	1	1	1	1	0	0	2.1	1.68	5.8	246.55	6.73	1.16	47.6
25.8	0	46	1	1	1	1	3	1	1	1	1	0	0	2.1	1.56	3.96	156.58	6.02	1.52	39.56
19.8	0	43	2	1	1	1	1	0	1	1	1	0	0	2.1	1.49	1.22	104.5	2.44	2	43.63
18.1	0	31	1	2	1	1	3	1	1	1	1	0	0	2.2	2	1.77	85.38	3.76	2.12	42.16
22.1	0	47	1	1	1	1	1	1	1	1	1	0	0	1.7	1.38	6.07	378.18	3.34	0.55	35.98
22.3	0	46	1	1	1	3	1	0	1	1	1	0	0	2.6	1.53	1.96	121.8	4.13	2.11	39.43
19.7	0	46	1	1	1	1	1	0	1	0	0	0	0	2.7	1.67	2.42	215.38	3.46	1.43	44.26
20.9	0	38	2	1	1	1	3	1	1	1	1	0	0	3.5	1.22	5.17	311.7	4.86	0.94	46.93
15.4	0	26	1	1	1	1	3	0	1	1	1	0	0	1.7	1.34	1.9	189.95	3.59	1.89	44.31
22.5	0	47	1	1	1	1	3	1	1	1	1	1	0	2.9	1.18	3.77	150	6.34	1.68	40.6
17.7	0	48	1	1	1	1	1	0	1	1	1	0	0	2.1	1.22	1.11	71.62	2.54	2.29	45
11.5	0	46	1	1	1	1	1	0	1	1	1	0	0	1.8	1.49	2.03	97.71	3.56	1.75	39.8
18.2	0	43	2	1	1	1	1	0	1	1	1	0	0	1.8	1.55	2.03	134.3	4.2	2.07	44.33
2.6	1	42	2	2	1	1	3	1	1	0	0	0	0	15.6	0.72	7.58	224.05	11.97	1.58	31.78
73.7	0	50	2	1	1	1	2	1	1	1	1	0	0	0.7	1.42	4.05	165.53	8.35	2.06	50.17
62	0	45	1	1	1	1	1	1	1	0	0	0	0	1.6	1.18	1.25	111.06	2.59	2.08	39.55
67.3	0	42	1	1	1	1	1	1	1	0	0	0	0	1.8	1.8	2.84	165.65	3.72	1.31	46.96
1.9	1	35	2	1	1	1	1	0	1	0	0	0	0	12.7	1.13	15.88	645.76	9.37	0.59	35.79
16.3	0	50	2	1	1	2	3	0	1	1	1	0	0	3.1	1.06	6.66	333.57	9.53	1.43	38.9
17.6	0	44	1	1	1	1	3	1	1	1	1	0	0	2	1.49	1.55	97.93	3.74	2.41	41.72
14.1	0	50	1	1	1	1	3	1	1	1	1	1	0	3.3	1.18	2.8	189.41	2.38	0.85	42.4
37.3	1	30	1	1	1	3	1	1	1	0	0	0	0	1.29	1.29	2.67	169.9	2.75	1.03	42.6
62.6	0	43	1	1	1	1	1	0	1	0	0	0	0	2.3	1.02	1.44	126.76	2.04	1.42	30.37
5.7	1	44	1	1	1	1	2	1	1	0	0	0	0	6.5	0.94	8.27	211.89	11.82	1.43	34.52
37.2	0	46	2	1	1	1	1	1	1	0	0	0	0	1.8	1.24	6.21	182.44	8.14	1.31	41.2
15.5	1	46	1	1	1	2	2	1	1	0	0	0	0	1.7	1.49	1.45	168.63	2.22	1.53	44.44
27.4	1	37	1	1	1	1	1	1	1	0	0	0	0	1.7	1.46	8.2	404.44	3.69	0.45	32.49
9.4	0	48	1	1	1	1	1	1	1	1	1	0	0	2.8	1.14	2.36	202.19	3.23	1.37	42.2
61.6	0	30	1	1	1	1	1	0	1	0	0	0	0	1.4	1.64	2.2	123.65	3.25	1.48	52.44
61.2	0	39	1	1	1	1	1	1	1	0	0	0	0	0.9	1.97	2.29	143.46	5.43	2.37	50.82
50.1	0	47	1	1	1	2	1	1	1	0	0	0	0	1	1.63	2.37	146.97	3.13	1.32	47.74
20.1	0	50	1	1	1	1	3	1	1	1	1	0	1	3.2	1.21	2.23	133.88	5.46	2.45	43.78
109.6	0	47	2	1	1	2	3	0	1	1	1	0	0	0.8	0.97	2.19	71.21	4.33	1.98	38.1
59.2	0	44	2	1	1	2	1	1	1	0	0	0	0	1.5	1.65	4.01	209.52	4.21	1.05	49.42
62.9	0	47	1	1	1	1	1	1	1	0	0	0	0	1.3	1.48	2.63	174.8	3.24	1.23	44.3
61.3	0	42	1	1	1	1	2	0	1	0	0	0	0	1.3	1.36	3.2	205.71	2.24	0.7	46.57
84.8	0	50	2	1	1	1	2	0	1	0	0	0	0	1.1	1.64	2.25	75.44	3.84	1.71	48.34
64.7	0	45	1	1	1	1	1	1	1	1	1	0	0	1.3	1.4	1.29	138.5	2.74	2.13	46.02
13.1	0	49	2	1	1	1	3	1	1	0	0	0	0	2.4	1.35	1.13	104.49	1.77	1.56	38.9
18.7	0	41	2	1	1	1	1	0	1	0	0	0	0	3	1.3	2.62	214.49	3.62	1.38	47.4
60.9	0	34	1	1	1	3	2	1	1	0	0	0	0	1.3	1.69	1.34	116.88	2.14	1.6	45.68
19.6	0	50	1	1	1	1	3	1	1	1	1	0	1	3.7	2.12	4.15	142.28	6.19	1.49	38.3
49.1	0	47	1	1	1	1	1	0	1	0	0	0	0	1.9	1.49	2.03	192.86	2.27	1.12	41.95
54.5	0	50	1	1	1	1	2	1	1	0	0	0	0	1.1	1.45	2.12	154.42	3.12	1.47	42.36
58.8	0	50	2	1	1	1	2	1	1	1	1	0	0	2.3	1.38	1.83	116.26	3.72	2.03	44
37.9	1	45	2	1	1	1	3	0	1	0	0	0	0	1.4	1.63	5.04	430.38	3.98	0.79	43.24
16.3	0	48	1	1	1	1	3	1	1	1	1	0	0	2.5	1.33	1.61	127.92	3.17	1.97	36.2
15.9	0	50	2	1	1	1	2	0	1	1	1	0	0	2.2	1.39	1.5	72.07	3.34	2.22	46
48.4	0	40	1	1	1	1	1	1	1	0	0	0	0	1.9	1.84	3.5	174.59	4.27	1.22	52.07
24.1	0	48	1	1	1	1	1	1	1	1	1	0	0	1.8	1.36	1.66	82.57	3.99	2.41	41.03
54	0	43	1	1	1	1	2	1	1	0	0	0	0	1.7	1.37	5.97	247.83	5.49	0.92	43.92
59.6	0	40	1	1	1	1	1	1	1	0	0	0	0	1.5	1.83	1.85	67.04	3.31	1.79	48.25
35	0	48	2	1	1	3	1	1	1	0	0	0	0	1.7	1.33	2.13	138.98	3.77	1.77	46.7
10.4	0	49	2	1	1	1	1	0	1	0	0	0	0	1.03	1.67	2.21	70.86	3.87	1.75	47.64
19	0	33	1	1	1	1	1	0	1	1	1	0	0	1.6	1.58	2.08	157.75	3.89	1.87	43.1
19.7	0	43	1	1	1	1	1	1	1	1	1	0	0	3.5	1.31	1.09	61.67	3.14	2.87	39.59
24.2	0	45	1	2	1	1	3	0	1	1	1	0	0	2	1.09	7.14	243.27	7.43	1.04	44.2
59.2	1	45	1	1	1	1	3	1	1	0	0	0	0	1.9	1.12	6.39	666.39	7.6	1.19	37.51
36.7	0	45	2	1	1	3	1	1	1	0	0	0	0	1.3	1.17	2.11	262.66	3.33	1.58	42.84
17.6	0	48	1	1	1	1	2	1	1	1	1	0	0	1.7	1.9	1.9	87.72	3.25	1.71	41.14
60.1	0	39	2	1	1	1	1	1	1	0	0	0	0	1	1.81	1.85	112.37	3.58	1.94	51.26
59.5	0	47	2	1	1	1	2	1	1	0	1	1	0	1.6	1.3	2.6	196.2	4.78	1.84	45.54
61.3	0	45	2	1	1	1	1	1	1	0	0	0	0	1.3	1.9	3.2	156.25	4.1	1.28	44.76
59.8	0	36	1	1	1	1	2	0	1	0	0	0	0	1.2	1.69	2.69	126.84	5.11	1.9	38.83
62.2	0	43	2	1	1	1	1	1	1	0	0	0	0	1.5	1.92	1.97	132.52	4.06	2.06	45.14
17.3	0	34	1	1	1	1	1	0	1	1	1	0	0	2.3	1.32	1.88	118.18	3.1	1.65	38.1
50.9	0	48	2	1	1	2	1	1	1	1	1	0	0	1.5	1.76	4.61	116.24	5.39	1.17	50.37
51.7	0	46	1	1	1	1	2	1	1	0	0	0	0	1.7	1.15	4.44	262.68	6.31	1.42	45.8
49.6	0	46	2	1	1	1	1	0	1	0	0	0	0	2.6	1.36	1.76	190.22	3.23	1.84	45.27
37.4	0	36	2	1	1	2	1	1	1	1	1	0	0	1.2	1.7	3.41	154.19	5.29	1.55	49.68
35.8	0	47	1	1	1	2	3	0	1	0	0	0	0	1.7	1.53	2.53	118.7	5.82	2.3	38.5
60.1	0	50	1	1	1	1	1	0	1	0	0	0	0	1.47	1.4	1.64	145.52	2.38	1.45	40.93
85.3	0	38	1	1	1	1	2	1	1	0	0	0	0	1.6	1.4	1.67	90.04	4.69	2.81	44.67
15.7	0	31	2	2	1	1	1	0	1	1	1	0	0	1.8	1.42	2.26	193.1	2.62	1.16	42.7
49.6	0	44	1	1	1	2	1	1	1	0	0	0	0	1.5	1.49	2.42	131.33	3.63	1.5	48.16
48.9	0	45	1	1	1	1	1	0	1	0	0	0	0	1.8	1.5	0.83	118.65	2.1	2.52	47.55
15.9	0	42	2	1	1	1	2	0	1	1	1	0	0	2.2	1.87	1.47	122	2.2	1.5	49.27
62	0	49	2	1	1	1	1	0	1	0	0	1	0	1.4	1.35	8.43	195.35	10.88	1.29	45.15
12.8	0	33	1	1	1	1	1	0	1	1	1	0	0	2.4	1.49	2.3	71.9	4.82	2.1	40.9
49.3	0	49	2	1	1	3	1	0	1	0	0	0	0	2	1.85	0.96	138.3	1.36	1.41	47.29
14.5	1	26	1	1	1	1	3	0	1	0	0	0	0	2.9	1.23	4.69	203.32	9.89	2.11	36.1
13.5	0	43	1	1	1	1	3	1	1	1	1	0	0	3.5	0.84	3.53	131	3.53	1	39.2
61.1	0	47	1	1	1	1	1	1	1	0	0	0	0	1.4	1.32	1.96	105.36	3.3	1.68	38.42
19.8	0	47	1	1	1	1	2	0	1	1	1	0	0	2.1	1.37	2.73	224.14	4.75	1.74	43.9
12.7	0	47	1	2	1	1	2	1	1	1	1	0	0	1.9	1.2	2.75	228.46	3.38	1.23	44.8
15.8	0	48	1	1	1	1	3	0	1	1	1	0	0	2.4	1.55	2.63	123.42	4.15	1.58	37.3
36.8	0	36	1	1	1	1	2	0	1	1	1	0	0	1.4	1.33	3.2	200.71	4.48	1.4	48.8
30.6	0	50	1	1	1	1	3	0	1	1	1	0	0	2.2	1.27	2.36	266.93	3	1.27	46.63
15	0	42	1	1	1	1	3	0	1	1	1	0	0	2.5	1.19	4.28	308.47	7.57	1.77	36.8
20.7	0	43	1	1	1	1	2	1	1	1	1	0	0	2.3	1.66	1.33	108.77	2.27	1.71	49.28
17.3	0	45	1	1	1	1	3	1	1	1	1	0	0	2.4	0.66	2.45	220.9	5.99	2.44	35.3
36.4	1	50	1	1	1	1	2	1	1	0	0	0	0	1.5	1.33	4.7	165.47	6.53	1.39	45.93
62	0	42	1	1	1	1	1	0	1	0	0	0	0	1.1	1.62	3	147.79	4.08	1.36	50.67
57.3	0	48	1	1	1	1	2	1	1	1	1	1	0	1.5	1.66	3.26	251.72	4.73	1.45	44.54
49.9	0	47	2	1	1	2	1	0	1	0	0	0	0	1.1	1.8	3.16	181.02	4.33	1.37	50.27
30.1	1	50	1	1	1	1	3	1	1	0	0	0	0	2	1.56	1.86	124.14	4.86	2.61	33.23
6.5	1	42	1	1	1	1	2	1	1	0	0	0	0	0.9	1.68	2.06	123.94	2.92	1.42	45.57
4	1	44	1	1	1	1	3	1	1	0	0	0	0	1.37	1.16	5.19	381.82	7.42	1.43	36.06
14.5	0	47	1	1	1	1	1	0	1	1	1	0	0	3.2	0.99	2.15	146.28	2.6	1.21	33.5
16.3	0	47	1	1	1	1	3	1	1	1	1	0	0	3.2	1.27	5.09	268.38	5.96	1.17	40.3
31.3	1	44	2	1	1	1	1	1	1	0	0	1	0	1.4	1.32	2.27	212.43	4.2	1.85	43.06
19.5	0	45	2	1	1	2	3	1	1	1	1	1	0	2.6	1.07	3.34	388.79	3.57	1.07	31.3
13.5	0	48	1	1	1	1	2	1	1	1	1	0	0	2.2	1.41	1.81	90.67	4.08	2.25	38.2
25.1	0	45	2	1	1	1	1	0	1	1	1	0	0	2.5	1.36	1.45	128.98	2.55	1.76	45.89
60.2	0	46	2	1	1	1	1	0	1	0	0	0	0	1.6	1.4	2.74	93.9	6.74	2.46	49.53
12.5	0	26	1	1	1	1	3	1	1	1	1	0	0	1.6	1.63	3.02	196.65	5.4	1.79	45.33
14.1	0	35	1	1	1	1	3	0	1	1	1	0	0	3.1	0.9	6.01	220.89	9.49	1.58	42.11
62.7	0	47	2	1	1	2	1	1	1	0	0	0	0	1.3	1.45	2.17	124.46	3.02	1.39	48.44
42	0	42	1	1	1	1	1	1	1	0	0	0	0	2.5	1.63	1.95	135.12	3.28	1.68	48.46
73	0	43	1	2	1	1	2	1	1	0	0	0	0	2.3	1.59	2.52	295	2.52	1	48.57
12.8	0	50	1	1	1	1	1	1	1	1	1	0	0	2.6	1.37	1.81	140.68	2.14	1.18	42.06
47.6	0	38	1	1	2	1	1	1	1	1	1	0	0	2.7	1.43	2.33	195	4.2	1.8	48.05
12.3	0	49	2	1	1	1	1	0	1	0	0	0	0	2.1	2.12	5.03	119.33	7.54	1.5	48.13
17.4	0	41	1	1	1	3	1	1	1	1	1	0	0	1.8	1.66	2.57	192.61	4.52	1.76	45.84
13.3	0	49	1	2	1	1	1	1	1	0	0	0	0	2.2	1.27	1.85	110.16	3.46	1.87	37.1
3.2	1	49	1	1	1	1	2	1	1	0	0	0	0	1.9	1.9	2.66	223.78	4.37	1.64	48.07
24.4	1	44	1	1	1	1	3	0	1	0	0	0	0	1.46	1.32	3.2	124.18	4.89	1.53	40.7
14.4	0	28	1	1	1	1	1	1	1	0	0	0	0	3.6	1.15	1.45	163.16	1.38	0.95	41
13.1	0	47	1	1	1	1	1	1	1	1	1	0	0	3.3	1.29	2.01	143.6	3.46	1.72	42.5
52.4	0	47	1	1	1	1	3	1	1	0	0	0	0	1.9	1.32	1.91	108.13	3.99	2.09	38.97
60.8	0	44	2	1	1	1	2	1	1	0	0	0	0	1.5	1.53	6.1	327.96	5.67	0.93	39.25
23.4	0	49	1	1	1	1	3	1	1	1	1	0	1	1.6	1.48	2.85	219.08	4.33	1.52	43.9
61.6	0	48	1	1	1	1	1	1	1	0	0	0	0	1.4	1.59	1.25	134.35	2.88	2.3	46.33
14.6	0	50	1	2	1	1	3	0	1	1	1	0	0	3.6	1.4	1.6	94.51	4.38	2.73	42.6
12	0	26	1	1	1	1	1	1	1	1	1	0	0	2.1	1.59	1.53	125	3.66	2.4	46.1
61.6	0	47	1	1	1	1	1	1	1	0	0	0	0	1.2	1.59	2.11	142.95	3.29	1.56	42.71
67.8	0	41	2	1	1	1	1	1	1	0	0	0	0	2.2	2.26	2.39	132.12	3.27	1.37	47.53
78.3	0	39	2	1	1	1	1	0	1	0	0	0	0	1.49	1.66	4	65.85	4.92	1.23	47.23
13.7	0	40	1	1	1	1	1	0	1	1	1	0	0	2.2	1.39	1.51	85.11	3.95	2.62	39.9
5.1	1	50	1	1	1	1	3	1	1	1	1	0	0	5.1	1.14	1.55	271.78	2.53	1.63	36.41
16.3	0	34	1	2	1	1	1	0	1	0	0	0	0	2.1	1.48	1.51	92.94	4.06	2.69	42.6
13.4	0	47	2	1	1	1	1	1	1	1	1	0	0	2.7	1.53	3.47	266.67	3.33	0.96	39.33
20.7	0	48	1	1	1	1	3	1	1	1	1	0	0	3.3	1.03	1.89	130.45	5.47	2.89	42.2
20.4	0	46	1	1	1	1	1	1	1	1	1	0	0	2.7	1.48	1.79	125.89	4.02	2.24	37.4
20.5	0	49	1	1	1	1	3	1	1	1	1	0	0	2.7	1.39	2.61	210.63	4.17	1.6	41.09
12.9	0	48	1	1	1	1	1	0	1	1	1	0	0	2.4	1.37	2.84	107.81	5.45	1.92	38.5
61.5	0	44	1	1	1	1	1	1	1	0	0	0	0	1.7	1.66	1.48	74.72	3.97	2.69	48.55
80.4	0	40	2	1	1	1	1	1	1	0	0	0	0	2.2	1.32	3.81	250.46	4.15	1.09	45.05
60.9	0	49	1	1	1	1	3	1	1	0	0	0	0	2.1	1.28	2.72	160.12	4.71	1.73	50.53
18.5	0	41	1	1	1	1	3	1	1	1	1	0	0	3.1	1.05	3.6	229.45	5.87	1.63	42.2
98.6	0	44	2	1	1	1	3	0	1	0	0	0	0	0.8	1.55	2.04	155.71	2.85	1.4	40.11
73.4	0	30	1	1	1	1	1	1	1	0	0	0	0	1.5	1.61	2.12	143.18	3.73	1.76	46.2
56.9	0	50	2	1	1	2	3	0	1	1	1	0	0	2.1	1.77	1.36	82.56	2.34	1.72	39.1
15.2	0	37	2	1	1	1	1	0	1	1	1	0	0	1.9	1.18	2.65	90.11	4.82	1.82	44
25.7	0	41	1	1	1	2	3	1	1	0	1	1	0	2	2.25	4.88	185.51	6.73	1.38	49.44
63	0	50	1	1	1	1	3	1	1	0	0	0	0	1.3	1.27	3.97	115.17	8.38	2.11	46.28
49.3	0	45	1	2	1	1	2	1	1	0	0	0	0	1.5	1.35	3.92	149.64	5.45	1.39	46.2
15.8	0	34	1	1	1	1	3	1	1	1	1	0	0	2.3	1.46	1.56	139.18	3.03	1.94	42.1
17.4	0	42	1	1	1	1	1	1	1	1	1	0	0	2.1	1.45	3.79	175.68	4.21	1.11	44.8
63	0	43	1	1	1	1	1	1	1	0	0	0	0	1.2	1.31	4.99	168.06	7.19	1.44	45.11
60.2	0	44	2	1	1	2	2	1	1	0	0	0	0	1.89	1.06	1.08	151.81	2.09	1.93	37.78
43.6	0	49	2	1	1	2	1	1	1	1	1	0	0	1.9	1.4	4.87	492.45	5.16	1.06	41.8
14.9	1	43	1	1	1	1	3	0	1	0	0	0	0	1.26	1.24	1.6	92.16	4.07	2.55	35.51
50.9	0	46	1	1	1	1	3	1	1	0	0	0	0	2.4	1.34	3.62	138.71	3.37	0.93	43.48
73.2	0	41	1	1	1	1	1	1	1	0	0	0	0	1.1	1.86	9.26	291.94	5.74	0.62	50.42
61.7	0	43	1	1	1	1	1	0	1	0	0	0	0	1.6	1.83	2.2	83.91	5.05	2.3	43.78
12.3	0	49	1	1	1	2	3	1	1	1	1	0	0	3.7	1.07	3.8	380.17	4.6	1.21	35
15.7	0	44	1	1	1	1	2	1	1	1	1	0	0	2	1.45	2.28	190.07	3.21	1.41	41.5
10.2	0	46	1	1	1	1	3	1	1	1	1	0	0	3	1.28	3.34	196.95	4.37	1.31	40.2
71.9	0	45	1	1	1	2	1	0	1	1	1	0	0	1.48	1.04	1.42	403.96	1.43	1.01	31.95
12.4	0	39	1	1	1	3	3	1	1	1	1	0	0	2.1	1.69	3.23	98.35	5.88	1.82	50.85
15.7	0	48	2	1	1	1	1	1	1	1	1	0	0	1.6	1.15	2.53	158.42	4.81	1.9	42.6
10.1	0	41	1	1	1	1	1	1	1	1	1	0	0	2.3	1.48	1.47	145.96	2.36	1.61	38.6
49.9	0	44	2	1	1	1	1	0	1	0	0	0	0	1.5	1.06	2.04	143.45	3.42	1.68	38.49
15.8	0	33	2	2	1	1	1	0	1	0	0	0	0	1.8	1.59	1.25	125.63	2	1.6	43.9
49.1	0	46	1	1	1	2	1	0	1	0	0	0	0	1.5	1.73	1.49	110.37	2.45	1.64	45.8
15.3	0	44	1	1	1	1	3	1	1	1	1	0	0	3.1	1.49	3.7	131.25	7.11	1.92	44.94
17.1	0	50	1	1	1	2	1	1	1	1	1	0	0	1.9	1.14	1.3	76.68	3.69	2.83	36.2
23.3	0	33	1	1	1	1	3	0	1	1	1	0	0	1.6	1.53	3.75	125.16	5.81	1.55	47.4
9.8	0	25	1	1	1	1	1	0	1	1	1	0	0	1.7	1.55	4.59	131.6	10.6	2.31	50.06
16	0	42	1	1	1	1	1	1	1	1	1	0	0	1.9	1.41	3.39	169.54	5.9	1.74	43.3
14.8	0	48	1	1	1	1	1	0	1	1	1	0	0	2.5	1.42	1.46	208.13	3.06	2.09	41.7
13	0	40	1	2	1	1	1	1	1	0	0	0	0	3	1.31	1.66	140.51	3.93	2.37	45.9
14.8	0	42	1	1	1	1	1	1	1	1	1	0	0	3.4	1.88	3.02	118.92	4.47	1.48	45.6
14.2	0	49	1	1	1	1	1	0	1	0	0	0	0	2.2	1.44	0.97	91.94	2.4	2.48	38
20.2	0	40	1	1	2	1	1	0	1	1	1	0	0	2.2	1.29	2.68	143.07	5.41	2.02	41.1
47	0	43	2	1	1	1	1	0	1	1	1	0	0	1.6	2.13	2.97	175.19	3.95	1.33	46.97
16.1	0	34	2	1	1	1	1	1	1	0	0	0	0	2.4	1.48	1.75	72.58	3.25	1.86	49.3
16.6	0	47	1	1	1	2	3	0	1	1	1	0	0	1.6	1.53	2.19	74.89	5.14	2.35	39.3
16	0	33	2	1	1	3	1	0	1	1	1	0	0	1.8	1.1	3.49	231.07	6.18	1.77	40.6
13.5	0	48	1	1	1	1	1	1	1	1	1	0	0	2.3	1.12	2.72	124.2	4.27	1.57	43.5
13.1	0	37	1	1	1	1	3	1	1	1	1	0	0	1.9	1.38	2.44	181.48	3.29	1.35	43.9
16.7	0	46	1	1	1	1	3	1	1	1	1	0	0	2.5	1.22	2.29	169.43	3.59	1.57	37.3
16	0	46	1	1	1	1	1	1	1	1	1	0	0	3.5	1.85	1.92	145.91	3.06	1.59	51.13
18.7	0	34	1	1	1	1	3	0	1	1	1	0	0	2	1.58	4.57	94.64	7.67	1.68	47.4
39.1	0	45	2	1	1	1	2	1	1	1	1	1	0	1.1	1.2	2.37	101.08	6.62	2.79	39.8
12.9	0	50	1	1	1	1	1	0	1	0	0	0	0	2.4	1.79	2.16	200.63	3.45	1.6	35
12.9	0	26	1	2	1	1	1	1	1	0	0	0	0	1.7	1.31	2.34	175.16	3.68	1.57	46.6
51	0	39	1	1	1	1	1	0	1	0	0	0	0	1.28	1.91	2.96	157.73	2.87	0.97	48.58
14.3	0	43	1	1	2	1	1	1	1	0	0	0	0	3.7	1.43	2.03	117.82	4.1	2.02	49.46
18.3	0	43	1	1	1	1	3	0	1	1	1	0	0	2.8	1.22	1.47	138.8	2.69	1.83	38.7
12.7	0	34	1	2	1	1	3	1	1	1	1	0	0	2.2	1.14	5.86	240.57	10.26	1.75	43.5
15.7	0	48	1	1	1	2	3	1	1	1	1	1	0	2.5	1.05	1.99	264.2	3.5	1.76	35.1
16.4	0	43	1	1	1	1	3	1	1	1	1	0	0	3.8	1.23	8.96	518.67	6.72	0.75	35.9
21.5	0	49	1	1	1	1	3	0	1	1	1	1	0	3.7	1.2	5.24	249.15	6.18	1.18	41.13
15.2	0	42	1	1	1	1	1	1	1	1	1	0	0	3.1	1.57	2.15	128.1	5.21	2.42	41.89
15.1	0	46	1	1	1	1	1	1	1	0	0	0	0	1.8	1.4	1.01	132.12	1.94	1.93	40.7
13.5	0	44	2	1	1	1	1	0	1	1	1	0	0	2.1	1.49	2.91	137.28	4.91	1.69	41.5
9.2	0	37	1	1	1	1	3	0	1	1	1	0	0	3.1	1.32	1.46	131.76	2.49	1.7	35.4
18.7	1	44	1	1	1	3	3	1	1	1	1	0	0	2.1	1.34	2.96	207.92	2.99	1.01	37.3
15.4	0	48	2	1	1	1	3	1	1	1	1	0	0	2.7	1	3.96	320.75	4.2	1.06	45.6
5.5	0	47	1	1	1	1	1	1	1	1	1	0	0	2.5	1.29	2.55	112.14	4.41	1.73	44
11.4	0	46	2	1	1	2	1	1	1	1	1	0	0	2.3	1.14	1.84	148.33	3.31	1.8	40.9
13.9	0	49	1	1	2	1	1	0	1	1	1	0	0	5	1.31	1.2	91.92	3.56	2.97	42.65
15.7	0	40	2	1	1	1	1	1	1	1	1	0	0	1.6	1.46	1.55	151.98	2.75	1.77	44.5
13.9	0	46	1	1	1	1	3	1	1	1	1	0	0	2.1	1.53	4.2	345.19	4.37	1.04	41.6
7.3	0	41	1	1	1	1	1	0	1	0	0	0	0	2.4	1.39	1.44	100	5.01	3.48	44.23
7.4	0	37	1	1	2	1	3	1	1	0	1	0	0	4.3	1.4	3.58	308.82	6.09	1.7	47.29
4.9	1	43	1	1	1	1	3	1	1	1	1	0	0	2.3	1.36	5.72	350	5.03	0.88	35.1
7.3	0	41	1	2	1	1	1	1	1	0	0	0	0	2.6	1.38	1.95	120.83	3.28	1.68	34.7
13.6	0	44	2	1	1	1	1	0	1	1	1	0	0	1.8	1.4	2.29	141.23	5.21	2.28	40.3
15.3	0	47	2	1	1	2	2	1	1	1	1	0	0	1.8	1.46	2.03	111.11	5.67	2.79	42.4
7.2	0	36	1	1	1	1	1	0	1	0	0	0	0	3.3	2.06	2.74	104.39	6.25	2.28	52.63
8.2	0	48	1	1	1	1	3	0	1	1	1	0	0	2.3	1.25	6.4	331.87	5.82	0.91	47.96
14.3	0	50	1	1	1	2	1	0	1	1	1	0	0	2	1.32	3.23	218.95	4.94	1.53	48.7
1.1	1	38	1	1	1	1	3	0	1	0	0	0	0	2.1	1.3	3.81	189.09	6.29	1.65	41.7
14.6	0	49	1	1	1	1	3	1	1	1	1	0	0	2.4	1.17	2.04	130.88	4.43	2.17	36.6
13.1	0	43	1	1	1	2	2	1	1	1	1	0	0	1.9	1.47	2.55	144.83	5.17	2.03	44.99
6.4	0	46	1	1	1	2	1	1	1	1	1	0	0	2.2	1.17	1.83	151.26	2.18	1.19	39
10.6	0	41	1	1	1	1	1	0	1	1	1	0	0	2.3	1.06	2.28	77.78	5.34	2.34	36.6
13.9	0	47	2	1	1	1	2	1	1	1	1	0	0	3.5	1.26	2.56	167.88	3.51	1.37	40.3
13.9	0	32	2	2	1	1	3	1	1	1	1	0	0	1.8	1.14	1.6	130.2	4.08	2.55	40.8
11.9	0	50	2	1	1	1	3	1	1	1	1	0	0	2.3	1.06	2.46	120.18	5.36	2.18	36
12.9	0	49	1	1	1	1	1	0	1	1	1	0	0	3.4	0.93	1.4	108.48	2.31	1.65	33.2
9.1	0	45	1	1	1	1	1	1	1	1	1	0	0	2.3	1.54	3.51	140.5	4.25	1.21	37.3
13.5	0	36	1	1	1	2	1	0	1	1	1	0	0	1.7	1.64	1.92	115.68	3.55	1.85	50.3
3.4	0	46	2	1	1	2	1	1	1	1	1	0	0	2	1.42	2.22	215.38	2.6	1.17	43.47
13	0	48	1	2	1	1	1	0	1	0	0	0	0	2.1	1.3	1.29	100	3.31	2.56	38.3
11.9	0	42	2	1	1	2	1	0	1	1	1	0	0	2	1.36	4.18	175.74	5.69	1.36	40.3
13.3	0	47	1	1	1	2	1	1	1	1	1	0	0	2.2	1.35	3.58	97.96	5.26	1.47	42.3
13	0	45	1	1	1	1	1	1	1	0	0	0	0	2.2	1.49	1.43	175.97	1.84	1.29	38.1
12.9	0	50	2	1	1	2	1	0	1	0	0	0	0	3.1	1.18	2.76	111.11	4.47	1.62	44.1
13.8	0	47	1	1	1	1	2	1	1	1	1	0	0	3.1	1.2	4.9	243.66	6.96	1.42	40.8
9.6	0	25	1	1	1	1	1	1	1	0	0	0	0	2.4	1.3	2.41	188.95	4.15	1.72	43.75
13.2	0	39	1	1	1	1	3	1	1	1	1	0	0	3	1.31	7.05	322.13	8.6	1.22	30.6
11.5	0	48	2	1	1	2	2	0	1	1	1	0	0	2.1	1.32	1.27	115.94	1.75	1.38	35.2
12.6	0	44	2	2	1	2	1	0	1	1	1	0	0	2	1.7	3.43	186.63	6.93	2.02	48.08
13.2	0	45	1	1	1	1	3	0	1	0	1	1	0	2	1.52	3.36	216.67	2.42	0.72	35.2
11.8	0	50	1	1	1	1	3	1	1	1	1	0	0	2.3	1.23	2.8	201.89	2.97	1.06	35
9.2	1	50	1	1	1	1	2	1	1	1	1	0	0	3	1.15	2.23	150.4	2.79	1.25	42
12.3	0	34	1	1	1	1	3	1	1	1	1	0	0	3.6	1.23	2.33	237	2.33	1	36.6
13	0	48	1	1	1	1	1	1	1	0	0	0	0	1.6	1.47	2.97	152.5	3.56	1.2	43.7
12.8	0	46	2	1	1	1	2	1	1	0	0	0	0	1.6	1.4	3.82	187.96	4.13	1.08	36.5
10.4	0	42	1	1	1	1	1	1	1	1	1	0	0	4.8	1.26	2.22	216.92	1.44	0.65	40.9
11.1	0	48	2	1	1	1	3	0	1	1	1	0	0	3.6	0.85	11.82	504.27	13.83	1.17	32.9
11.7	0	43	2	2	1	2	1	1	1	1	1	0	0	1.8	1.14	2.32	119.18	3.39	1.46	43.1
6.2	1	38	1	1	1	1	3	0	1	1	1	0	0	1.6	1.38	5.87	227.27	7.1	1.21	47.1
9.6	0	43	2	1	1	1	1	1	1	1	1	0	0	1.2	1.57	2.84	126.35	4.75	1.67	44.7
11.9	0	46	2	1	1	1	1	1	1	1	1	0	0	2	1.3	4.5	117.72	7.11	1.58	42.4
6.5	0	39	1	1	1	2	1	1	1	1	1	0	0	1.8	1.42	3.64	248.75	5.83	1.6	44.1
12.7	0	35	1	2	2	1	1	1	1	1	1	0	0	3.5	1.83	2.04	133.85	3.97	1.95	50.76
6.9	0	45	1	1	1	2	1	0	1	0	0	0	0	2.4	1.38	1.99	200	3.04	1.53	35.2
12.5	0	38	2	1	1	1	1	1	1	1	1	0	0	1.7	1.19	2.15	116.84	4.21	1.96	45.4
8.5	0	46	1	1	1	1	1	1	1	1	1	0	0	1.8	1.32	2.04	119.41	5.58	2.73	39.3
7.8	0	50	1	1	1	2	2	1	1	1	1	0	0	1.4	1.25	1.61	180.9	3.2	1.99	36.8
6.9	0	49	1	1	1	1	2	0	1	1	1	0	0	2.4	1.22	4.21	219.81	4.46	1.06	39.8
3.9	0	41	1	1	1	1	1	1	1	0	0	0	0	1.8	1.86	1.5	151.47	3.05	2.04	48.11
8.2	0	38	1	1	1	2	2	1	1	1	1	0	0	2.5	1.32	2.5	175.61	3.07	1.23	40.8
10.3	0	45	2	2	1	2	2	0	1	1	1	1	0	2	1.27	2.05	120.59	4.18	2.04	40.4
9.6	0	34	1	1	1	1	1	1	1	0	0	0	0	2.2	1.35	2.22	167.97	3.4	1.53	38.1
11.3	0	47	1	1	1	2	1	0	1	1	1	0	0	2.4	1.14	6.86	172.07	7.61	1.11	38.9
4	1	48	1	1	1	1	3	1	1	1	1	0	0	2	1.39	3.27	369.91	3.69	1.13	40.9
10.8	0	40	1	1	1	1	3	1	1	1	1	0	0	1.3	1.7	6.3	113.51	9.32	1.48	58.2
7.4	0	41	1	1	1	3	2	1	1	1	1	0	0	2.8	1.02	5.49	321.05	4.17	0.76	33.7
5.4	0	48	1	1	1	1	3	1	1	1	1	0	0	2.5	1.27	3.38	214.85	3.41	1.01	40
5.6	0	43	1	1	1	1	1	1	1	1	1	0	0	2.4	1.56	1.99	99.61	5.14	2.58	41.6
9.1	0	47	1	1	1	1	1	0	1	1	1	0	0	2	1.41	2.06	115.96	4.39	2.13	37.1
7.3	0	46	1	1	1	1	1	1	1	1	1	0	0	1.7	1.09	2.84	227.01	4.95	1.74	40.1
10.7	0	41	1	1	1	1	1	1	1	0	0	0	0	1.8	1.48	3.7	172.8	4.62	1.25	36.5
3.7	0	34	2	1	1	1	1	1	1	0	0	0	0	1.7	1.52	3.17	67.93	5.83	1.84	47
5	0	50	1	1	1	1	1	1	1	0	0	0	0	2	1.53	2.68	180.45	3.57	1.33	42.7
4.9	0	48	1	2	1	2	1	1	1	0	0	0	0	2.5	1.32	3.48	118.68	6.34	1.82	42.9
6.5	0	36	2	1	1	1	1	0	1	1	1	0	0	1.7	1.52	2.23	106.06	4.41	1.98	42.6
5.2	0	50	1	1	1	1	3	1	1	0	1	0	0	2.2	1.16	1.99	88.82	3.2	1.61	40.2
7.4	0	48	1	1	1	2	1	1	1	0	1	0	0	1.8	0.79	2.93	169.06	5.31	1.81	21.9
6.6	0	49	1	1	1	1	1	1	1	0	0	0	0	2.4	1.48	1.26	116.02	2.28	1.81	48.7
7.4	0	35	1	1	1	1	1	1	1	0	1	0	0	1.6	1.09	4.15	195.02	9.18	2.21	32.4
6.5	0	49	1	1	1	1	3	0	1	0	0	0	0	2.5	1.27	1.36	97.49	2.71	1.99	38.4
6.2	0	37	2	1	1	1	1	1	1	0	1	0	0	1.8	1.25	2.56	189.8	5.01	1.96	44.2
3.9	0	50	1	1	1	1	1	1	1	0	0	0	0	2.1	1.92	2.25	159.14	4.19	1.86	50.31
9.1	0	44	2	1	1	1	1	1	1	0	0	0	0	2.3	1.6	1.7	93.52	4.2	2.47	44.2
